# Supplementary material for: Auroral classification ergonomics and the implications for machine learning
Source: Copernicus journal article supplement (doi:10.5194/gi-9-267-2020), 2020-07-09
Supplement: Supplementary file 1 [file gi-9-267-2020-supplement.zip]

Archive with 2 entries (2 files):
- gi-9-267-2020-supplement-title-page.pdf
- aurnn_class_20191120a.csv
