# Supplementary material for: Auroral classification ergonomics and the implications for machine learning
Source: Copernicus journal article supplement (doi:10.5194/gi-9-267-2020), 2020-07-09
Supplement: Supplementary file 1 [file gi-9-267-2020-supplement.zip › aurnn_class_20191120a.csv]

# data_classification_AK_DMK.csv
#
# IMG = Image file name from IRF auroral all-sky camera	Kiruna
# LABEL_AK = Classification label from A.Kvammen	UiT
# LABEL_DMK = Classification label from D.McKay	NORCE
#
# Label categories:
# 0 Breakup
# 1 Coloured
# 2 Curled structure
# 3 EW Arc(s)/band(s)
# 4 Discrete - Irregular/cut/non structured
# 5 Patchy/Stripy - recovery phase aurora
# 6 Edge
# 7 Faint aurora/clear
# 8 Unknown/complex
# 9 Rejected
#
# Data compiled by A.Kvammen	UiT	20-Nov-2019.
# Repository: seid.uit.no/data
# 2019
#
IMG	LABEL_AK	LABEL_DMK
KRN20100303T223000E06000Q.JPG	8	5
KRN20100303T223100E06000Q.JPG	8	8
KRN20100303T223200E06000Q.JPG	8	3
KRN20100303T223300E06000Q.JPG	8	6
KRN20100317T224000E06000Q.JPG	8	7
KRN20100317T224100E06000Q.JPG	8	7
KRN20100317T224200E06000Q.JPG	8	7
KRN20100317T224300E06000Q.JPG	8	5
KRN20100317T224400E06000Q.JPG	8	4
KRN20100317T224500E06000Q.JPG	8	4
KRN20100317T224600E06000Q.JPG	8	4
KRN20100317T224700E06000Q.JPG	8	4
KRN20100317T224800E06000Q.JPG	8	4
KRN20100317T224900E06000Q.JPG	8	4
KRN20100317T225000E06000Q.JPG	8	4
KRN20100317T225100E06000Q.JPG	8	4
KRN20100317T225200E06000Q.JPG	5	4
KRN20100317T225300E06000Q.JPG	5	8
KRN20100317T225400E06000Q.JPG	5	4
KRN20100317T225500E06000Q.JPG	5	4
KRN20100317T225600E06000Q.JPG	8	5
KRN20100317T225700E06000Q.JPG	8	5
KRN20100317T225800E06000Q.JPG	8	8
KRN20100317T225900E06000Q.JPG	8	5
KRN20100317T230000E06000Q.JPG	8	5
KRN20100402T210400E06000Q.JPG	8	5
KRN20100402T210500E06000Q.JPG	8	7
KRN20100402T210600E06000Q.JPG	8	5
KRN20100402T210700E06000Q.JPG	8	5
KRN20100402T210800E06000Q.JPG	8	5
KRN20100402T210900E06000Q.JPG	5	5
KRN20100402T211000E06000Q.JPG	5	5
KRN20100402T211100E06000Q.JPG	5	5
KRN20100402T211200E06000Q.JPG	5	5
KRN20100402T211300E06000Q.JPG	5	5
KRN20100402T211400E06000Q.JPG	5	5
KRN20100402T211500E06000Q.JPG	5	5
KRN20100402T211600E06000Q.JPG	5	5
KRN20100402T211700E06000Q.JPG	5	5
KRN20100402T211800E06000Q.JPG	5	5
KRN20100402T211900E06000Q.JPG	5	5
KRN20100402T212000E06000Q.JPG	5	5
KRN20100402T212100E06000Q.JPG	5	5
KRN20100402T212200E06000Q.JPG	5	5
KRN20100402T212300E06000Q.JPG	5	5
KRN20100402T212400E06000Q.JPG	5	5
KRN20100402T212500E06000Q.JPG	5	5
KRN20100402T212600E06000Q.JPG	5	5
KRN20100402T212700E06000Q.JPG	5	5
KRN20100402T212800E06000Q.JPG	5	5
KRN20100402T212900E06000Q.JPG	5	5
KRN20100402T213000E06000Q.JPG	5	5
KRN20100402T213100E06000Q.JPG	8	5
KRN20100402T213200E06000Q.JPG	5	5
KRN20100402T213300E06000Q.JPG	8	5
KRN20100402T213400E06000Q.JPG	8	5
KRN20100402T213500E06000Q.JPG	8	5
KRN20100402T213600E06000Q.JPG	8	5
KRN20100402T213700E06000Q.JPG	8	2
KRN20100402T213800E06000Q.JPG	8	5
KRN20100402T213900E06000Q.JPG	8	6
KRN20100402T214000E06000Q.JPG	8	5
KRN20100402T214100E06000Q.JPG	8	5
KRN20100402T214200E06000Q.JPG	5	5
KRN20100402T214300E06000Q.JPG	5	5
KRN20100402T214400E06000Q.JPG	5	5
KRN20100402T214500E06000Q.JPG	5	5
KRN20100402T214600E06000Q.JPG	5	5
KRN20100402T214700E06000Q.JPG	5	5
KRN20100402T214800E06000Q.JPG	5	3
KRN20100402T214900E06000Q.JPG	8	5
KRN20100402T215000E06000Q.JPG	8	8
KRN20100402T215100E06000Q.JPG	8	3
KRN20100402T215200E06000Q.JPG	8	8
KRN20100402T215300E06000Q.JPG	8	3
KRN20100402T215400E06000Q.JPG	8	5
KRN20100402T215500E06000Q.JPG	8	5
KRN20100402T215600E06000Q.JPG	5	5
KRN20100402T215700E06000Q.JPG	5	5
KRN20100402T215800E06000Q.JPG	5	3
KRN20100402T215900E06000Q.JPG	8	5
KRN20100402T220000E06000Q.JPG	8	5
KRN20100402T220100E06000Q.JPG	3	3
KRN20100402T220200E06000Q.JPG	3	3
KRN20100402T220300E06000Q.JPG	3	3
KRN20100402T220400E06000Q.JPG	3	3
KRN20100402T220500E06000Q.JPG	3	3
KRN20100402T220600E06000Q.JPG	3	3
KRN20100402T220700E06000Q.JPG	3	3
KRN20100402T220800E06000Q.JPG	3	3
KRN20100402T220900E06000Q.JPG	3	3
KRN20100402T221000E06000Q.JPG	3	3
KRN20100402T221100E06000Q.JPG	3	3
KRN20100402T221200E06000Q.JPG	3	7
KRN20100402T221300E06000Q.JPG	3	3
KRN20100402T221400E06000Q.JPG	3	3
KRN20100402T221500E06000Q.JPG	8	3
KRN20100402T221600E06000Q.JPG	8	5
KRN20100402T221700E06000Q.JPG	8	8
KRN20100402T221800E06000Q.JPG	8	6
KRN20100402T221900E06000Q.JPG	8	8
KRN20100402T222000E06000Q.JPG	8	2
KRN20100402T222100E06000Q.JPG	8	0
KRN20100402T222200E06000Q.JPG	8	8
KRN20100402T222300E06000Q.JPG	8	8
KRN20100402T222400E06000Q.JPG	5	5
KRN20100402T222500E06000Q.JPG	5	5
KRN20100402T222600E06000Q.JPG	5	3
KRN20100402T222700E06000Q.JPG	8	6
KRN20100402T222800E06000Q.JPG	8	3
KRN20100402T222900E06000Q.JPG	8	5
KRN20100402T223000E06000Q.JPG	5	3
KRN20100402T223100E06000Q.JPG	5	3
KRN20100402T223200E06000Q.JPG	5	8
KRN20100402T223300E06000Q.JPG	8	3
KRN20100402T223400E06000Q.JPG	8	3
KRN20100402T223500E06000Q.JPG	8	3
KRN20100402T223600E06000Q.JPG	8	3
KRN20100402T223700E06000Q.JPG	8	3
KRN20100402T223800E06000Q.JPG	8	3
KRN20100402T223900E06000Q.JPG	8	3
KRN20100402T224000E06000Q.JPG	8	5
KRN20100402T224100E06000Q.JPG	8	3
KRN20100402T224200E06000Q.JPG	8	5
KRN20100402T224300E06000Q.JPG	8	3
KRN20100402T224400E06000Q.JPG	8	5
KRN20100402T224500E06000Q.JPG	8	3
KRN20100402T224600E06000Q.JPG	8	3
KRN20100402T224700E06000Q.JPG	8	5
KRN20100402T224800E06000Q.JPG	8	3
KRN20100402T224900E06000Q.JPG	8	8
KRN20100402T225000E06000Q.JPG	8	3
KRN20100402T225100E06000Q.JPG	8	3
KRN20100402T225200E06000Q.JPG	8	3
KRN20100402T225300E06000Q.JPG	8	5
KRN20100402T225400E06000Q.JPG	8	3
KRN20100402T225500E06000Q.JPG	8	5
KRN20100402T225600E06000Q.JPG	8	3
KRN20100402T225700E06000Q.JPG	8	8
KRN20100402T225800E06000Q.JPG	8	5
KRN20100402T225900E06000Q.JPG	8	5
KRN20100402T230000E06000Q.JPG	8	3
KRN20100402T230100E06000Q.JPG	8	5
KRN20100402T230200E06000Q.JPG	3	3
KRN20100402T230300E06000Q.JPG	3	3
KRN20100402T230400E06000Q.JPG	3	3
KRN20100402T230500E06000Q.JPG	3	3
KRN20100402T230600E06000Q.JPG	3	3
KRN20100402T230700E06000Q.JPG	3	3
KRN20100402T230800E06000Q.JPG	3	3
KRN20100402T230900E06000Q.JPG	3	5
KRN20100402T231000E06000Q.JPG	3	3
KRN20100402T231100E06000Q.JPG	3	3
KRN20100402T231200E06000Q.JPG	3	3
KRN20100402T231300E06000Q.JPG	3	3
KRN20100402T231400E06000Q.JPG	3	3
KRN20100402T231500E06000Q.JPG	3	3
KRN20100402T231600E06000Q.JPG	3	3
KRN20100402T231700E06000Q.JPG	3	3
KRN20100402T231800E06000Q.JPG	3	3
KRN20100402T231900E06000Q.JPG	3	3
KRN20100402T232000E06000Q.JPG	3	3
KRN20100402T232100E06000Q.JPG	3	3
KRN20100402T232200E06000Q.JPG	3	3
KRN20100402T232300E06000Q.JPG	3	3
KRN20100402T232400E06000Q.JPG	3	6
KRN20100402T232500E06000Q.JPG	3	3
KRN20100402T232600E06000Q.JPG	3	3
KRN20100402T232700E06000Q.JPG	3	5
KRN20100402T232800E06000Q.JPG	8	5
KRN20100402T232900E06000Q.JPG	8	3
KRN20100402T233000E06000Q.JPG	3	3
KRN20100402T233100E06000Q.JPG	3	3
KRN20100402T233200E06000Q.JPG	3	3
KRN20100402T233300E06000Q.JPG	3	3
KRN20100402T233400E06000Q.JPG	3	3
KRN20100402T233500E06000Q.JPG	3	3
KRN20100402T233600E06000Q.JPG	3	3
KRN20100402T233700E06000Q.JPG	3	8
KRN20100402T233800E06000Q.JPG	3	8
KRN20100402T233900E06000Q.JPG	3	3
KRN20100402T234000E06000Q.JPG	3	3
KRN20100402T234100E06000Q.JPG	3	3
KRN20100402T234200E06000Q.JPG	3	8
KRN20100402T234300E06000Q.JPG	3	3
KRN20100402T234400E06000Q.JPG	3	3
KRN20100402T234500E06000Q.JPG	3	5
KRN20100402T234600E06000Q.JPG	3	3
KRN20100402T234700E06000Q.JPG	3	8
KRN20100402T234800E06000Q.JPG	3	3
KRN20100402T234900E06000Q.JPG	3	6
KRN20100402T235000E06000Q.JPG	3	3
KRN20100402T235100E06000Q.JPG	3	3
KRN20100402T235200E06000Q.JPG	8	5
KRN20100402T235300E06000Q.JPG	8	3
KRN20100402T235400E06000Q.JPG	8	3
KRN20100402T235500E06000Q.JPG	3	3
KRN20100402T235600E06000Q.JPG	8	3
KRN20100402T235700E06000Q.JPG	3	3
KRN20100402T235800E06000Q.JPG	3	3
KRN20100402T235900E06000Q.JPG	3	3
KRN20100403T213000E06000Q.JPG	7	7
KRN20100403T213100E06000Q.JPG	7	7
KRN20100403T213200E06000Q.JPG	7	7
KRN20100403T213300E06000Q.JPG	7	7
KRN20100403T213400E06000Q.JPG	6	3
KRN20100403T213500E06000Q.JPG	8	6
KRN20100403T213600E06000Q.JPG	8	6
KRN20100403T213700E06000Q.JPG	8	8
KRN20100403T213800E06000Q.JPG	8	4
KRN20100403T213900E06000Q.JPG	5	8
KRN20100403T214000E06000Q.JPG	8	4
KRN20100404T220000E06000Q.JPG	7	7
KRN20100404T220100E06000Q.JPG	7	7
KRN20100404T220200E06000Q.JPG	7	7
KRN20100404T220300E06000Q.JPG	7	7
KRN20100404T220400E06000Q.JPG	7	7
KRN20100404T220500E06000Q.JPG	7	7
KRN20100404T220600E06000Q.JPG	7	5
KRN20100404T220700E06000Q.JPG	8	3
KRN20100404T220800E06000Q.JPG	3	3
KRN20100404T220900E06000Q.JPG	3	3
KRN20100404T221000E06000Q.JPG	3	3
KRN20100404T221100E06000Q.JPG	2	0
KRN20100404T221200E06000Q.JPG	3	2
KRN20100404T221300E06000Q.JPG	4	2
KRN20100404T221400E06000Q.JPG	5	5
KRN20100404T221500E06000Q.JPG	5	5
KRN20100404T221600E06000Q.JPG	5	5
KRN20100404T221700E06000Q.JPG	5	5
KRN20100404T221800E06000Q.JPG	5	5
KRN20100404T221900E06000Q.JPG	5	5
KRN20100404T222000E06000Q.JPG	5	5
KRN20100404T222100E06000Q.JPG	5	5
KRN20100404T222200E06000Q.JPG	5	5
KRN20100404T222300E06000Q.JPG	5	5
KRN20100404T222400E06000Q.JPG	5	5
KRN20100404T222500E06000Q.JPG	5	5
KRN20100404T222600E06000Q.JPG	5	5
KRN20100404T222700E06000Q.JPG	5	5
KRN20100404T222800E06000Q.JPG	5	5
KRN20100404T222900E06000Q.JPG	5	5
KRN20100404T223000E06000Q.JPG	5	5
KRN20100404T223100E06000Q.JPG	5	5
KRN20100404T223200E06000Q.JPG	5	5
KRN20100404T223300E06000Q.JPG	5	5
KRN20100404T223400E06000Q.JPG	5	5
KRN20100404T223500E06000Q.JPG	5	5
KRN20100404T223600E06000Q.JPG	5	5
KRN20100404T223700E06000Q.JPG	8	2
KRN20100404T223800E06000Q.JPG	8	2
KRN20100404T223900E06000Q.JPG	5	5
KRN20100404T224000E06000Q.JPG	8	5
KRN20100404T224100E06000Q.JPG	5	8
KRN20100404T224200E06000Q.JPG	5	5
KRN20100404T224300E06000Q.JPG	5	5
KRN20100404T224400E06000Q.JPG	5	5
KRN20100404T224500E06000Q.JPG	5	5
KRN20100404T224600E06000Q.JPG	5	3
KRN20100404T224700E06000Q.JPG	5	5
KRN20100404T224800E06000Q.JPG	5	5
KRN20100404T224900E06000Q.JPG	5	5
KRN20100404T225000E06000Q.JPG	5	5
KRN20100406T224000E06000Q.JPG	3	8
KRN20100406T224100E06000Q.JPG	3	6
KRN20100406T224200E06000Q.JPG	3	6
KRN20100406T224300E06000Q.JPG	8	6
KRN20100406T224400E06000Q.JPG	8	3
KRN20100406T224500E06000Q.JPG	8	6
KRN20100406T224600E06000Q.JPG	8	6
KRN20100406T224700E06000Q.JPG	8	6
KRN20100406T224800E06000Q.JPG	3	3
KRN20100406T224900E06000Q.JPG	3	3
KRN20100406T225000E06000Q.JPG	3	3
KRN20100406T225100E06000Q.JPG	3	0
KRN20100406T225200E06000Q.JPG	8	2
KRN20100406T225300E06000Q.JPG	8	0
KRN20100406T225400E06000Q.JPG	5	5
KRN20100406T225500E06000Q.JPG	5	0
KRN20100406T225600E06000Q.JPG	5	5
KRN20100406T225700E06000Q.JPG	5	5
KRN20100406T225800E06000Q.JPG	5	5
KRN20100406T225900E06000Q.JPG	5	5
KRN20100406T230000E06000Q.JPG	5	5
KRN20100406T230100E06000Q.JPG	5	5
KRN20100406T230200E06000Q.JPG	5	5
KRN20100406T230300E06000Q.JPG	5	5
KRN20100406T230400E06000Q.JPG	5	5
KRN20100406T230500E06000Q.JPG	5	5
KRN20100406T230600E06000Q.JPG	5	5
KRN20100406T230700E06000Q.JPG	5	3
KRN20100406T230800E06000Q.JPG	5	5
KRN20100406T230900E06000Q.JPG	8	5
KRN20100406T231000E06000Q.JPG	5	5
KRN20100406T231100E06000Q.JPG	8	5
KRN20100406T231200E06000Q.JPG	8	8
KRN20100406T231300E06000Q.JPG	8	8
KRN20100406T231400E06000Q.JPG	8	5
KRN20100406T231500E06000Q.JPG	8	5
KRN20100406T231600E06000Q.JPG	8	5
KRN20100406T231700E06000Q.JPG	8	8
KRN20100406T231800E06000Q.JPG	8	2
KRN20100406T231900E06000Q.JPG	3	3
KRN20100406T232000E06000Q.JPG	3	3
KRN20100906T231000E06000Q.JPG	7	5
KRN20100906T231100E06000Q.JPG	7	7
KRN20100906T231200E06000Q.JPG	7	7
KRN20100906T231300E06000Q.JPG	8	5
KRN20100906T231400E06000Q.JPG	8	5
KRN20100906T231500E06000Q.JPG	9	8
KRN20100906T231600E06000Q.JPG	9	6
KRN20100906T231700E06000Q.JPG	9	3
KRN20100906T231800E06000Q.JPG	9	5
KRN20100906T231900E06000Q.JPG	9	5
KRN20100906T232000E06000Q.JPG	9	5
KRN20100906T232100E06000Q.JPG	9	5
KRN20100906T232200E06000Q.JPG	9	5
KRN20100906T232300E06000Q.JPG	9	5
KRN20100906T232400E06000Q.JPG	9	5
KRN20100906T232500E06000Q.JPG	9	5
KRN20100906T232600E06000Q.JPG	9	5
KRN20100906T232700E06000Q.JPG	9	5
KRN20100906T232800E06000Q.JPG	9	5
KRN20100906T232900E06000Q.JPG	9	5
KRN20100906T233000E06000Q.JPG	9	5
KRN20100906T233100E06000Q.JPG	9	5
KRN20100906T233200E06000Q.JPG	9	5
KRN20100906T233300E06000Q.JPG	9	5
KRN20100906T233400E06000Q.JPG	9	5
KRN20100906T233500E06000Q.JPG	9	5
KRN20100906T233600E06000Q.JPG	9	5
KRN20100906T233700E06000Q.JPG	9	7
KRN20100906T233800E06000Q.JPG	9	7
KRN20100906T233900E06000Q.JPG	9	7
KRN20100906T234000E06000Q.JPG	9	7
KRN20100907T220000E06000Q.JPG	9	7
KRN20100907T220100E06000Q.JPG	7	7
KRN20100907T220200E06000Q.JPG	8	6
KRN20100907T220300E06000Q.JPG	8	6
KRN20100907T220400E06000Q.JPG	6	6
KRN20100907T220500E06000Q.JPG	8	6
KRN20100907T220600E06000Q.JPG	3	3
KRN20100907T220700E06000Q.JPG	3	3
KRN20100907T220800E06000Q.JPG	3	3
KRN20100907T220900E06000Q.JPG	3	3
KRN20100907T221000E06000Q.JPG	8	3
KRN20100907T221100E06000Q.JPG	8	6
KRN20100907T221200E06000Q.JPG	7	7
KRN20100907T221300E06000Q.JPG	7	7
KRN20100907T221400E06000Q.JPG	7	7
KRN20100907T221500E06000Q.JPG	7	7
KRN20100907T221600E06000Q.JPG	7	7
KRN20100907T221700E06000Q.JPG	7	7
KRN20100907T221800E06000Q.JPG	7	7
KRN20100907T221900E06000Q.JPG	7	7
KRN20100907T222000E06000Q.JPG	7	7
KRN20100908T210700E06000Q.JPG	8	8
KRN20100908T210800E06000Q.JPG	7	7
KRN20100908T210900E06000Q.JPG	7	7
KRN20100908T211000E06000Q.JPG	7	7
KRN20100908T211100E06000Q.JPG	6	6
KRN20100908T211200E06000Q.JPG	8	4
KRN20100908T211300E06000Q.JPG	8	4
KRN20100908T211400E06000Q.JPG	8	4
KRN20100908T211500E06000Q.JPG	8	4
KRN20100908T211600E06000Q.JPG	8	5
KRN20100908T211700E06000Q.JPG	8	4
KRN20100908T211800E06000Q.JPG	4	4
KRN20100908T211900E06000Q.JPG	5	5
KRN20100908T212000E06000Q.JPG	5	5
KRN20100908T212100E06000Q.JPG	8	5
KRN20100908T212200E06000Q.JPG	8	7
KRN20100908T212300E06000Q.JPG	8	5
KRN20100908T212400E06000Q.JPG	8	8
KRN20100908T212500E06000Q.JPG	8	4
KRN20100908T212600E06000Q.JPG	8	4
KRN20100908T212700E06000Q.JPG	8	7
KRN20100908T212800E06000Q.JPG	8	8
KRN20100908T212900E06000Q.JPG	8	9
KRN20100908T213000E06000Q.JPG	8	9
KRN20101012T232000E06000Q.JPG	9	9
KRN20101012T232100E06000Q.JPG	9	9
KRN20101012T232200E06000Q.JPG	9	9
KRN20101012T232300E06000Q.JPG	9	9
KRN20101212T213700E06000Q.JPG	5	5
KRN20101212T213800E06000Q.JPG	5	5
KRN20101212T213900E06000Q.JPG	5	5
KRN20101212T214000E06000Q.JPG	5	5
KRN20101212T214100E06000Q.JPG	5	5
KRN20101212T214200E06000Q.JPG	5	5
KRN20101212T214300E06000Q.JPG	5	5
KRN20101212T214400E06000Q.JPG	5	5
KRN20101212T214500E06000Q.JPG	5	5
KRN20101212T214600E06000Q.JPG	5	5
KRN20101212T214700E06000Q.JPG	5	5
KRN20101212T214800E06000Q.JPG	5	5
KRN20101212T214900E06000Q.JPG	5	5
KRN20101212T215000E06000Q.JPG	5	5
KRN20101212T215100E06000Q.JPG	5	5
KRN20101212T215200E06000Q.JPG	5	5
KRN20101212T215300E06000Q.JPG	5	5
KRN20101212T215400E06000Q.JPG	5	5
KRN20101212T215500E06000Q.JPG	5	5
KRN20101212T215600E06000Q.JPG	5	5
KRN20101212T215700E06000Q.JPG	5	5
KRN20101212T215800E06000Q.JPG	5	5
KRN20101212T215900E06000Q.JPG	5	7
KRN20101212T220000E06000Q.JPG	5	5
KRN20101212T220100E06000Q.JPG	8	7
KRN20101212T220200E06000Q.JPG	8	7
KRN20101212T220300E06000Q.JPG	8	7
KRN20101212T220400E06000Q.JPG	8	5
KRN20101212T220500E06000Q.JPG	8	5
KRN20101212T220600E06000Q.JPG	8	7
KRN20101212T220700E06000Q.JPG	8	5
KRN20101212T220800E06000Q.JPG	5	5
KRN20101212T220900E06000Q.JPG	8	5
KRN20101212T221000E06000Q.JPG	8	5
KRN20101212T221100E06000Q.JPG	8	8
KRN20101212T221200E06000Q.JPG	8	8
KRN20101212T221300E06000Q.JPG	8	5
KRN20101212T221400E06000Q.JPG	8	5
KRN20101212T221500E06000Q.JPG	8	5
KRN20101212T221600E06000Q.JPG	8	6
KRN20101212T221700E06000Q.JPG	8	5
KRN20101212T221800E06000Q.JPG	8	8
KRN20101212T221900E06000Q.JPG	8	7
KRN20101212T222000E06000Q.JPG	8	7
KRN20101212T222100E06000Q.JPG	8	7
KRN20101212T222200E06000Q.JPG	8	5
KRN20101212T222300E06000Q.JPG	8	5
KRN20101212T222400E06000Q.JPG	8	8
KRN20101212T222500E06000Q.JPG	8	8
KRN20101212T222600E06000Q.JPG	8	8
KRN20101212T222700E06000Q.JPG	8	7
KRN20101212T222800E06000Q.JPG	8	7
KRN20101212T222900E06000Q.JPG	8	7
KRN20101212T223000E06000Q.JPG	8	7
KRN20101213T005000E06000Q.JPG	8	7
KRN20101213T005100E06000Q.JPG	6	6
KRN20101213T005200E06000Q.JPG	6	7
KRN20101213T005300E06000Q.JPG	6	6
KRN20101213T005400E06000Q.JPG	6	6
KRN20101213T005500E06000Q.JPG	6	6
KRN20101213T005600E06000Q.JPG	6	5
KRN20101213T005700E06000Q.JPG	8	6
KRN20101213T005800E06000Q.JPG	8	6
KRN20101213T005900E06000Q.JPG	8	6
KRN20101213T010000E06000Q.JPG	8	6
KRN20101213T010100E06000Q.JPG	8	8
KRN20101213T010200E06000Q.JPG	8	5
KRN20101213T010300E06000Q.JPG	8	8
KRN20101213T010400E06000Q.JPG	8	3
KRN20101213T010500E06000Q.JPG	8	5
KRN20101213T010600E06000Q.JPG	8	5
KRN20101213T010700E06000Q.JPG	8	5
KRN20101213T010800E06000Q.JPG	8	5
KRN20101213T010900E06000Q.JPG	5	5
KRN20101213T011000E06000Q.JPG	5	5
KRN20101213T011100E06000Q.JPG	5	5
KRN20101213T011200E06000Q.JPG	5	5
KRN20101213T011300E06000Q.JPG	5	5
KRN20101213T011400E06000Q.JPG	5	5
KRN20101213T011500E06000Q.JPG	5	5
KRN20101213T011600E06000Q.JPG	5	5
KRN20101213T011700E06000Q.JPG	5	5
KRN20101213T011800E06000Q.JPG	5	5
KRN20101213T011900E06000Q.JPG	5	5
KRN20101213T012000E06000Q.JPG	5	5
KRN20101213T012100E06000Q.JPG	5	5
KRN20101213T012200E06000Q.JPG	8	7
KRN20101213T012300E06000Q.JPG	8	5
KRN20101213T012400E06000Q.JPG	8	7
KRN20101213T012500E06000Q.JPG	8	5
KRN20101213T012600E06000Q.JPG	8	7
KRN20101213T012700E06000Q.JPG	8	7
KRN20101213T012800E06000Q.JPG	8	5
KRN20101213T012900E06000Q.JPG	8	5
KRN20101213T013000E06000Q.JPG	8	7
KRN20110103T190000E06000Q.JPG	7	9
KRN20110103T190100E06000Q.JPG	7	9
KRN20110103T190200E06000Q.JPG	7	9
KRN20110103T190300E06000Q.JPG	7	7
KRN20110103T190400E06000Q.JPG	7	9
KRN20110103T190500E06000Q.JPG	7	9
KRN20110103T190600E06000Q.JPG	7	9
KRN20110103T190700E06000Q.JPG	7	9
KRN20110103T190800E06000Q.JPG	7	9
KRN20110103T190900E06000Q.JPG	7	9
KRN20110103T191000E06000Q.JPG	9	9
KRN20110103T191100E06000Q.JPG	9	6
KRN20110103T191200E06000Q.JPG	9	9
KRN20110103T191300E06000Q.JPG	9	6
KRN20110103T191400E06000Q.JPG	9	9
KRN20110103T191500E06000Q.JPG	9	9
KRN20110103T191600E06000Q.JPG	9	9
KRN20110103T191700E06000Q.JPG	9	9
KRN20110103T191800E06000Q.JPG	9	6
KRN20110103T191900E06000Q.JPG	9	8
KRN20110103T192000E06000Q.JPG	9	6
KRN20110103T192100E06000Q.JPG	9	6
KRN20110103T192200E06000Q.JPG	9	6
KRN20110103T192300E06000Q.JPG	9	6
KRN20110103T192400E06000Q.JPG	9	6
KRN20110103T192500E06000Q.JPG	9	9
KRN20110103T192600E06000Q.JPG	9	6
KRN20110103T192700E06000Q.JPG	9	6
KRN20110103T192800E06000Q.JPG	9	6
KRN20110103T192900E06000Q.JPG	9	6
KRN20110103T193000E06000Q.JPG	9	6
KRN20110103T193100E06000Q.JPG	9	8
KRN20110103T193200E06000Q.JPG	9	9
KRN20110103T193300E06000Q.JPG	9	9
KRN20110103T193400E06000Q.JPG	9	9
KRN20110103T193500E06000Q.JPG	9	9
KRN20110103T193600E06000Q.JPG	9	8
KRN20110103T193700E06000Q.JPG	9	8
KRN20110103T193800E06000Q.JPG	9	9
KRN20110103T193900E06000Q.JPG	9	9
KRN20110103T194000E06000Q.JPG	9	9
KRN20110103T194100E06000Q.JPG	9	9
KRN20110103T194200E06000Q.JPG	9	9
KRN20110103T194300E06000Q.JPG	9	9
KRN20110103T194400E06000Q.JPG	9	9
KRN20110103T194500E06000Q.JPG	9	9
KRN20110103T194600E06000Q.JPG	9	8
KRN20110103T194700E06000Q.JPG	9	9
KRN20110103T194800E06000Q.JPG	9	9
KRN20110103T194900E06000Q.JPG	9	9
KRN20110103T195000E06000Q.JPG	9	9
KRN20110103T195100E06000Q.JPG	9	8
KRN20110103T195200E06000Q.JPG	9	6
KRN20110103T195300E06000Q.JPG	9	9
KRN20110103T195400E06000Q.JPG	9	9
KRN20110103T195500E06000Q.JPG	9	9
KRN20110103T195600E06000Q.JPG	3	3
KRN20110103T195700E06000Q.JPG	3	3
KRN20110103T195800E06000Q.JPG	3	3
KRN20110103T195900E06000Q.JPG	9	8
KRN20110103T200000E06000Q.JPG	9	8
KRN20110103T200100E06000Q.JPG	9	3
KRN20110103T200200E06000Q.JPG	9	6
KRN20110103T200300E06000Q.JPG	9	4
KRN20110103T200400E06000Q.JPG	9	8
KRN20110103T200500E06000Q.JPG	9	4
KRN20110103T200600E06000Q.JPG	9	6
KRN20110103T200700E06000Q.JPG	9	6
KRN20110103T200800E06000Q.JPG	9	6
KRN20110103T200900E06000Q.JPG	9	6
KRN20110103T201000E06000Q.JPG	9	9
KRN20110103T201100E06000Q.JPG	9	8
KRN20110103T201200E06000Q.JPG	9	9
KRN20110103T201300E06000Q.JPG	9	8
KRN20110103T201400E06000Q.JPG	9	8
KRN20110103T201500E06000Q.JPG	9	8
KRN20110103T201600E06000Q.JPG	9	4
KRN20110103T201700E06000Q.JPG	9	4
KRN20110103T201800E06000Q.JPG	9	8
KRN20110103T201900E06000Q.JPG	9	9
KRN20110103T202000E06000Q.JPG	9	8
KRN20110103T202100E06000Q.JPG	9	8
KRN20110103T202200E06000Q.JPG	9	8
KRN20110103T202300E06000Q.JPG	9	8
KRN20110103T202400E06000Q.JPG	9	6
KRN20110103T202500E06000Q.JPG	9	6
KRN20110103T202600E06000Q.JPG	9	6
KRN20110103T202700E06000Q.JPG	9	3
KRN20110103T202800E06000Q.JPG	9	8
KRN20110103T202900E06000Q.JPG	9	3
KRN20110103T203000E06000Q.JPG	9	5
KRN20110103T203100E06000Q.JPG	9	8
KRN20110103T203200E06000Q.JPG	9	8
KRN20110103T203300E06000Q.JPG	9	8
KRN20110103T203400E06000Q.JPG	9	8
KRN20110103T203500E06000Q.JPG	9	4
KRN20110103T203600E06000Q.JPG	9	5
KRN20110103T203700E06000Q.JPG	9	5
KRN20110103T203800E06000Q.JPG	9	6
KRN20110103T203900E06000Q.JPG	9	6
KRN20110103T204000E06000Q.JPG	9	6
KRN20110103T204100E06000Q.JPG	9	8
KRN20110103T204200E06000Q.JPG	9	8
KRN20110103T204300E06000Q.JPG	9	5
KRN20110103T204400E06000Q.JPG	9	5
KRN20110103T204500E06000Q.JPG	9	5
KRN20110103T204600E06000Q.JPG	9	5
KRN20110103T204700E06000Q.JPG	9	8
KRN20110103T204800E06000Q.JPG	9	5
KRN20110103T204900E06000Q.JPG	9	5
KRN20110103T205000E06000Q.JPG	9	5
KRN20110103T205100E06000Q.JPG	9	5
KRN20110103T205200E06000Q.JPG	9	8
KRN20110103T205300E06000Q.JPG	9	8
KRN20110103T205400E06000Q.JPG	9	8
KRN20110103T205500E06000Q.JPG	9	8
KRN20110103T205600E06000Q.JPG	9	5
KRN20110103T205700E06000Q.JPG	9	8
KRN20110103T205800E06000Q.JPG	9	9
KRN20110103T205900E06000Q.JPG	9	9
KRN20110103T210000E06000Q.JPG	9	9
KRN20110108T202000E06000Q.JPG	7	9
KRN20110108T202100E06000Q.JPG	7	8
KRN20110108T202200E06000Q.JPG	6	6
KRN20110108T202300E06000Q.JPG	8	6
KRN20110108T202400E06000Q.JPG	6	6
KRN20110108T202500E06000Q.JPG	4	8
KRN20110108T202600E06000Q.JPG	4	4
KRN20110108T202700E06000Q.JPG	4	4
KRN20110108T202800E06000Q.JPG	8	8
KRN20110108T202900E06000Q.JPG	8	9
KRN20110108T203000E06000Q.JPG	8	8
KRN20110108T203100E06000Q.JPG	8	4
KRN20110108T203200E06000Q.JPG	8	8
KRN20110108T203300E06000Q.JPG	8	8
KRN20110108T203400E06000Q.JPG	8	8
KRN20110108T203500E06000Q.JPG	7	9
KRN20110108T203600E06000Q.JPG	7	9
KRN20110108T203700E06000Q.JPG	7	8
KRN20110108T203800E06000Q.JPG	8	8
KRN20110108T203900E06000Q.JPG	8	4
KRN20110108T204000E06000Q.JPG	8	4
KRN20110307T203700E06000Q.JPG	5	9
KRN20110307T203800E06000Q.JPG	5	9
KRN20110307T203900E06000Q.JPG	5	9
KRN20110307T204000E06000Q.JPG	5	9
KRN20110307T204100E06000Q.JPG	5	9
KRN20110307T204200E06000Q.JPG	5	9
KRN20110307T204300E06000Q.JPG	5	9
KRN20110307T204400E06000Q.JPG	5	9
KRN20110307T204500E06000Q.JPG	5	9
KRN20110307T204600E06000Q.JPG	5	9
KRN20110307T204700E06000Q.JPG	5	9
KRN20110307T204800E06000Q.JPG	5	9
KRN20110307T204900E06000Q.JPG	9	9
KRN20110307T205000E06000Q.JPG	5	9
KRN20110307T205100E06000Q.JPG	5	9
KRN20110307T205200E06000Q.JPG	5	9
KRN20110307T205300E06000Q.JPG	9	9
KRN20110307T205400E06000Q.JPG	5	9
KRN20110307T205500E06000Q.JPG	5	9
KRN20110307T205600E06000Q.JPG	5	9
KRN20110307T205700E06000Q.JPG	5	9
KRN20110307T205800E06000Q.JPG	5	9
KRN20110307T205900E06000Q.JPG	5	9
KRN20110307T210000E06000Q.JPG	5	9
KRN20110307T210100E06000Q.JPG	5	9
KRN20110307T210200E06000Q.JPG	5	9
KRN20110307T210300E06000Q.JPG	5	9
KRN20110307T210400E06000Q.JPG	5	9
KRN20110307T210500E06000Q.JPG	9	9
KRN20110307T210600E06000Q.JPG	9	9
KRN20110307T210700E06000Q.JPG	5	9
KRN20110307T210800E06000Q.JPG	5	9
KRN20110307T210900E06000Q.JPG	5	9
KRN20110307T211000E06000Q.JPG	5	9
KRN20110307T211100E06000Q.JPG	5	9
KRN20110307T211200E06000Q.JPG	5	9
KRN20110307T211300E06000Q.JPG	5	9
KRN20110307T211400E06000Q.JPG	5	9
KRN20110307T211500E06000Q.JPG	5	9
KRN20110307T211600E06000Q.JPG	5	9
KRN20110307T211700E06000Q.JPG	5	9
KRN20110307T211800E06000Q.JPG	5	9
KRN20110307T211900E06000Q.JPG	5	9
KRN20110307T212000E06000Q.JPG	5	9
KRN20110322T225000E06000Q.JPG	7	9
KRN20110322T225100E06000Q.JPG	7	8
KRN20110322T225200E06000Q.JPG	7	9
KRN20110322T225300E06000Q.JPG	8	1
KRN20110322T225400E06000Q.JPG	1	1
KRN20110322T225500E06000Q.JPG	1	1
KRN20110322T225600E06000Q.JPG	8	1
KRN20110322T225700E06000Q.JPG	8	8
KRN20110322T225800E06000Q.JPG	6	8
KRN20110322T225900E06000Q.JPG	6	8
KRN20110322T230000E06000Q.JPG	6	8
KRN20110330T000000E06000Q.JPG	3	3
KRN20110330T000100E06000Q.JPG	3	3
KRN20110330T000200E06000Q.JPG	3	3
KRN20110330T000300E06000Q.JPG	3	3
KRN20110330T000400E06000Q.JPG	3	3
KRN20110330T000500E06000Q.JPG	3	3
KRN20110330T000600E06000Q.JPG	3	3
KRN20110330T000700E06000Q.JPG	3	3
KRN20110330T000800E06000Q.JPG	3	3
KRN20110330T000900E06000Q.JPG	3	3
KRN20110330T001000E06000Q.JPG	3	3
KRN20110330T001100E06000Q.JPG	3	3
KRN20110330T001200E06000Q.JPG	3	3
KRN20110330T001300E06000Q.JPG	3	3
KRN20110330T001400E06000Q.JPG	3	3
KRN20110330T001500E06000Q.JPG	3	3
KRN20110330T001600E06000Q.JPG	3	3
KRN20110330T001700E06000Q.JPG	3	3
KRN20110330T001800E06000Q.JPG	3	3
KRN20110330T001900E06000Q.JPG	3	3
KRN20110330T002000E06000Q.JPG	3	3
KRN20110330T002100E06000Q.JPG	3	3
KRN20110330T002200E06000Q.JPG	3	3
KRN20110330T002300E06000Q.JPG	3	3
KRN20110330T002400E06000Q.JPG	1	8
KRN20110330T002500E06000Q.JPG	1	3
KRN20110330T002600E06000Q.JPG	8	3
KRN20110330T002700E06000Q.JPG	3	3
KRN20110330T002800E06000Q.JPG	3	3
KRN20110330T002900E06000Q.JPG	3	3
KRN20110330T003000E06000Q.JPG	3	3
KRN20110330T003100E06000Q.JPG	3	3
KRN20110330T003200E06000Q.JPG	3	3
KRN20110330T003300E06000Q.JPG	3	3
KRN20110330T003400E06000Q.JPG	2	2
KRN20110330T003500E06000Q.JPG	8	2
KRN20110330T003600E06000Q.JPG	2	2
KRN20110330T003700E06000Q.JPG	2	2
KRN20110330T003800E06000Q.JPG	2	2
KRN20110330T003900E06000Q.JPG	2	2
KRN20110330T004000E06000Q.JPG	2	2
KRN20110330T004100E06000Q.JPG	2	2
KRN20110330T004200E06000Q.JPG	2	2
KRN20110330T004300E06000Q.JPG	2	2
KRN20110330T004400E06000Q.JPG	8	2
KRN20110330T004500E06000Q.JPG	8	2
KRN20110330T004600E06000Q.JPG	8	2
KRN20110330T004700E06000Q.JPG	2	2
KRN20110330T004800E06000Q.JPG	2	2
KRN20110330T004900E06000Q.JPG	2	1
KRN20110330T005000E06000Q.JPG	1	1
KRN20110330T005100E06000Q.JPG	1	2
KRN20110330T005200E06000Q.JPG	3	3
KRN20110330T005300E06000Q.JPG	3	3
KRN20110330T005400E06000Q.JPG	8	4
KRN20110403T211100E06000Q.JPG	9	9
KRN20110403T211200E06000Q.JPG	9	8
KRN20110403T211300E06000Q.JPG	9	9
KRN20110403T211400E06000Q.JPG	5	9
KRN20110403T211500E06000Q.JPG	5	9
KRN20110403T211600E06000Q.JPG	9	9
KRN20110403T211700E06000Q.JPG	9	9
KRN20110403T211800E06000Q.JPG	9	9
KRN20110403T211900E06000Q.JPG	9	9
KRN20110403T212000E06000Q.JPG	9	9
KRN20110403T212100E06000Q.JPG	5	5
KRN20110403T212200E06000Q.JPG	5	5
KRN20110403T212300E06000Q.JPG	6	6
KRN20110403T212400E06000Q.JPG	8	8
KRN20110403T212500E06000Q.JPG	5	5
KRN20110403T212600E06000Q.JPG	8	0
KRN20110403T212700E06000Q.JPG	5	5
KRN20110403T212800E06000Q.JPG	8	0
KRN20110403T212900E06000Q.JPG	8	0
KRN20110403T213000E06000Q.JPG	5	9
KRN20110403T213100E06000Q.JPG	5	5
KRN20110403T213600E06000Q.JPG	5	8
KRN20110403T213700E06000Q.JPG	5	9
KRN20110404T000000E06000Q.JPG	7	8
KRN20110404T000100E06000Q.JPG	7	8
KRN20110404T000200E06000Q.JPG	7	3
KRN20110404T000300E06000Q.JPG	7	3
KRN20110404T000400E06000Q.JPG	8	3
KRN20110404T000500E06000Q.JPG	8	3
KRN20110404T000600E06000Q.JPG	8	3
KRN20110404T000700E06000Q.JPG	8	3
KRN20110404T000800E06000Q.JPG	8	3
KRN20110404T000900E06000Q.JPG	8	3
KRN20110404T001000E06000Q.JPG	8	3
KRN20110404T001100E06000Q.JPG	8	3
KRN20110927T204000E06000Q.JPG	9	9
KRN20110927T204100E06000Q.JPG	9	9
KRN20110927T204200E06000Q.JPG	9	9
KRN20110927T204300E06000Q.JPG	9	9
KRN20110927T204400E06000Q.JPG	9	9
KRN20110927T204500E06000Q.JPG	9	9
KRN20110927T204600E06000Q.JPG	9	9
KRN20110927T204700E06000Q.JPG	9	9
KRN20110927T204800E06000Q.JPG	9	9
KRN20110927T204900E06000Q.JPG	9	9
KRN20110927T205000E06000Q.JPG	9	9
KRN20110927T205100E06000Q.JPG	2	9
KRN20110927T205200E06000Q.JPG	0	9
KRN20110927T205300E06000Q.JPG	0	0
KRN20110927T205400E06000Q.JPG	4	9
KRN20110927T205500E06000Q.JPG	8	9
KRN20110927T205600E06000Q.JPG	4	9
KRN20110927T205700E06000Q.JPG	8	9
KRN20110927T205800E06000Q.JPG	8	9
KRN20110927T205900E06000Q.JPG	5	9
KRN20110927T210000E06000Q.JPG	5	9
KRN20110927T210100E06000Q.JPG	5	9
KRN20110927T210200E06000Q.JPG	5	9
KRN20110927T210300E06000Q.JPG	8	9
KRN20110927T210400E06000Q.JPG	3	9
KRN20110927T210500E06000Q.JPG	3	9
KRN20110927T210600E06000Q.JPG	3	9
KRN20110927T210700E06000Q.JPG	8	9
KRN20110927T210800E06000Q.JPG	8	9
KRN20110927T210900E06000Q.JPG	8	9
KRN20110927T211000E06000Q.JPG	8	9
KRN20110927T211100E06000Q.JPG	8	9
KRN20110927T211200E06000Q.JPG	8	9
KRN20110927T211300E06000Q.JPG	8	9
KRN20110927T211400E06000Q.JPG	8	9
KRN20110927T211500E06000Q.JPG	8	9
KRN20110927T211600E06000Q.JPG	2	9
KRN20110927T211700E06000Q.JPG	8	9
KRN20110927T211800E06000Q.JPG	8	9
KRN20110927T211900E06000Q.JPG	8	9
KRN20110927T212000E06000Q.JPG	8	9
KRN20110927T212100E06000Q.JPG	8	9
KRN20110927T212200E06000Q.JPG	8	9
KRN20110927T212300E06000Q.JPG	8	9
KRN20110927T212400E06000Q.JPG	8	9
KRN20110927T212500E06000Q.JPG	0	9
KRN20110927T212600E06000Q.JPG	0	9
KRN20110927T212700E06000Q.JPG	0	9
KRN20110927T212800E06000Q.JPG	0	9
KRN20110927T212900E06000Q.JPG	5	9
KRN20110927T213000E06000Q.JPG	5	9
KRN20110927T213100E06000Q.JPG	5	9
KRN20110927T213200E06000Q.JPG	5	8
KRN20110927T213300E06000Q.JPG	5	9
KRN20110927T213400E06000Q.JPG	8	9
KRN20110927T213500E06000Q.JPG	2	9
KRN20110927T213600E06000Q.JPG	2	9
KRN20110927T213700E06000Q.JPG	8	9
KRN20110927T213800E06000Q.JPG	2	9
KRN20110927T213900E06000Q.JPG	8	9
KRN20110927T214000E06000Q.JPG	8	9
KRN20110927T214100E06000Q.JPG	6	9
KRN20110927T214200E06000Q.JPG	6	9
KRN20110927T214300E06000Q.JPG	8	9
KRN20110927T214400E06000Q.JPG	8	9
KRN20110927T214500E06000Q.JPG	8	9
KRN20110927T214600E06000Q.JPG	8	9
KRN20110927T214700E06000Q.JPG	8	9
KRN20110927T214800E06000Q.JPG	8	9
KRN20110927T214900E06000Q.JPG	8	9
KRN20110927T215000E06000Q.JPG	8	9
KRN20110927T215100E06000Q.JPG	0	9
KRN20110927T215200E06000Q.JPG	8	9
KRN20110927T215300E06000Q.JPG	8	9
KRN20110927T215400E06000Q.JPG	8	9
KRN20110927T215500E06000Q.JPG	8	9
KRN20110927T215600E06000Q.JPG	8	9
KRN20110927T215700E06000Q.JPG	8	9
KRN20110927T215800E06000Q.JPG	8	9
KRN20110927T215900E06000Q.JPG	8	9
KRN20110927T220000E06000Q.JPG	8	9
KRN20110927T220100E06000Q.JPG	0	9
KRN20110927T220200E06000Q.JPG	0	9
KRN20110927T220300E06000Q.JPG	0	0
KRN20110927T220400E06000Q.JPG	0	0
KRN20110927T220500E06000Q.JPG	0	0
KRN20110927T220600E06000Q.JPG	0	0
KRN20110927T220700E06000Q.JPG	0	5
KRN20110927T220800E06000Q.JPG	8	5
KRN20110927T220900E06000Q.JPG	8	5
KRN20110927T221000E06000Q.JPG	5	5
KRN20110927T221100E06000Q.JPG	5	5
KRN20110927T221200E06000Q.JPG	5	5
KRN20110927T221300E06000Q.JPG	5	5
KRN20110927T221400E06000Q.JPG	5	5
KRN20110927T221500E06000Q.JPG	5	5
KRN20110927T221600E06000Q.JPG	5	5
KRN20110927T221700E06000Q.JPG	5	5
KRN20110927T221800E06000Q.JPG	5	5
KRN20110927T221900E06000Q.JPG	5	5
KRN20110927T222000E06000Q.JPG	5	5
KRN20110927T222100E06000Q.JPG	5	5
KRN20110927T222200E06000Q.JPG	5	5
KRN20110927T222300E06000Q.JPG	5	5
KRN20110927T222400E06000Q.JPG	5	5
KRN20110927T222500E06000Q.JPG	5	5
KRN20110927T222600E06000Q.JPG	5	5
KRN20110927T222700E06000Q.JPG	8	5
KRN20110927T222800E06000Q.JPG	8	5
KRN20110927T222900E06000Q.JPG	8	5
KRN20110927T223000E06000Q.JPG	8	0
KRN20110927T223100E06000Q.JPG	8	0
KRN20110927T223200E06000Q.JPG	8	8
KRN20110927T223300E06000Q.JPG	8	1
KRN20110927T223400E06000Q.JPG	4	0
KRN20110927T223500E06000Q.JPG	4	8
KRN20110927T223600E06000Q.JPG	8	5
KRN20110927T223700E06000Q.JPG	5	8
KRN20110927T223800E06000Q.JPG	5	5
KRN20110927T223900E06000Q.JPG	8	5
KRN20110927T224000E06000Q.JPG	8	8
KRN20110927T224100E06000Q.JPG	4	8
KRN20110927T224200E06000Q.JPG	4	8
KRN20110927T224300E06000Q.JPG	8	5
KRN20110927T224400E06000Q.JPG	8	0
KRN20110927T224500E06000Q.JPG	0	0
KRN20110927T224600E06000Q.JPG	8	0
KRN20110927T224700E06000Q.JPG	8	5
KRN20110927T224800E06000Q.JPG	8	5
KRN20110927T224900E06000Q.JPG	8	5
KRN20110927T225000E06000Q.JPG	8	5
KRN20110927T225100E06000Q.JPG	8	5
KRN20110927T225200E06000Q.JPG	8	5
KRN20110927T225300E06000Q.JPG	8	5
KRN20110927T225400E06000Q.JPG	8	5
KRN20110927T225500E06000Q.JPG	5	5
KRN20110927T225600E06000Q.JPG	5	5
KRN20110927T225700E06000Q.JPG	5	8
KRN20110927T225800E06000Q.JPG	8	5
KRN20110927T225900E06000Q.JPG	8	8
KRN20110927T230000E06000Q.JPG	8	5
KRN20110927T230100E06000Q.JPG	8	5
KRN20110927T230200E06000Q.JPG	8	5
KRN20110927T230300E06000Q.JPG	8	5
KRN20110927T230400E06000Q.JPG	8	5
KRN20110927T230500E06000Q.JPG	8	8
KRN20110927T230600E06000Q.JPG	8	8
KRN20110927T230700E06000Q.JPG	8	8
KRN20110927T230800E06000Q.JPG	8	5
KRN20110927T230900E06000Q.JPG	8	5
KRN20110927T231000E06000Q.JPG	7	8
KRN20110927T231100E06000Q.JPG	8	4
KRN20110927T231200E06000Q.JPG	8	4
KRN20110927T231300E06000Q.JPG	8	8
KRN20110927T231400E06000Q.JPG	7	8
KRN20110927T231500E06000Q.JPG	8	6
KRN20110927T231600E06000Q.JPG	6	6
KRN20110927T231700E06000Q.JPG	6	8
KRN20110927T231800E06000Q.JPG	8	5
KRN20110927T231900E06000Q.JPG	8	5
KRN20110927T232000E06000Q.JPG	8	8
KRN20110927T232100E06000Q.JPG	8	5
KRN20110927T232200E06000Q.JPG	8	8
KRN20110927T232300E06000Q.JPG	8	5
KRN20110927T232400E06000Q.JPG	8	8
KRN20110927T232500E06000Q.JPG	8	8
KRN20110927T232600E06000Q.JPG	8	8
KRN20110927T232700E06000Q.JPG	8	5
KRN20110927T232800E06000Q.JPG	8	5
KRN20110927T232900E06000Q.JPG	8	5
KRN20110927T233000E06000Q.JPG	8	5
KRN20110927T233100E06000Q.JPG	8	8
KRN20110927T233200E06000Q.JPG	3	8
KRN20110927T233300E06000Q.JPG	8	5
KRN20110927T233400E06000Q.JPG	8	5
KRN20110927T233500E06000Q.JPG	8	5
KRN20110927T233600E06000Q.JPG	3	5
KRN20110927T233700E06000Q.JPG	3	8
KRN20110927T233800E06000Q.JPG	8	5
KRN20110927T233900E06000Q.JPG	3	8
KRN20110927T234000E06000Q.JPG	3	5
KRN20110927T234100E06000Q.JPG	8	5
KRN20110927T234200E06000Q.JPG	8	5
KRN20110927T234300E06000Q.JPG	8	5
KRN20110927T234400E06000Q.JPG	8	5
KRN20110927T234500E06000Q.JPG	8	5
KRN20110927T234600E06000Q.JPG	8	5
KRN20110927T234700E06000Q.JPG	8	5
KRN20110927T234800E06000Q.JPG	8	5
KRN20110927T234900E06000Q.JPG	5	8
KRN20110927T235000E06000Q.JPG	5	5
KRN20110927T235100E06000Q.JPG	5	5
KRN20110927T235200E06000Q.JPG	8	5
KRN20110927T235300E06000Q.JPG	8	5
KRN20110927T235400E06000Q.JPG	5	5
KRN20110927T235500E06000Q.JPG	5	5
KRN20110927T235600E06000Q.JPG	5	5
KRN20110927T235700E06000Q.JPG	5	5
KRN20110927T235800E06000Q.JPG	5	5
KRN20110927T235900E06000Q.JPG	5	5
KRN20110928T011000E06000Q.JPG	8	6
KRN20110928T011100E06000Q.JPG	8	6
KRN20110928T011200E06000Q.JPG	8	6
KRN20110928T011300E06000Q.JPG	8	6
KRN20110928T011400E06000Q.JPG	8	8
KRN20110928T011500E06000Q.JPG	8	6
KRN20110928T011600E06000Q.JPG	8	6
KRN20110928T011700E06000Q.JPG	8	6
KRN20110928T011800E06000Q.JPG	6	6
KRN20110928T011900E06000Q.JPG	6	6
KRN20110928T012000E06000Q.JPG	8	6
KRN20110928T012100E06000Q.JPG	8	6
KRN20110928T012200E06000Q.JPG	6	6
KRN20110928T012300E06000Q.JPG	6	6
KRN20110928T012400E06000Q.JPG	6	6
KRN20110928T012500E06000Q.JPG	8	6
KRN20110928T012600E06000Q.JPG	8	8
KRN20110928T012700E06000Q.JPG	8	8
KRN20110928T012800E06000Q.JPG	8	8
KRN20110928T012900E06000Q.JPG	8	8
KRN20110928T013000E06000Q.JPG	8	8
KRN20110928T013100E06000Q.JPG	8	5
KRN20110928T013200E06000Q.JPG	8	8
KRN20110928T013300E06000Q.JPG	8	6
KRN20110928T013400E06000Q.JPG	8	8
KRN20110928T013500E06000Q.JPG	6	6
KRN20110928T013600E06000Q.JPG	6	6
KRN20110928T013700E06000Q.JPG	6	6
KRN20110928T013800E06000Q.JPG	6	6
KRN20110928T013900E06000Q.JPG	8	6
KRN20110928T014000E06000Q.JPG	6	6
KRN20110928T014100E06000Q.JPG	8	6
KRN20110928T014200E06000Q.JPG	8	8
KRN20110928T014300E06000Q.JPG	8	6
KRN20110928T014400E06000Q.JPG	8	6
KRN20110928T014500E06000Q.JPG	2	6
KRN20110928T014600E06000Q.JPG	8	8
KRN20110928T014700E06000Q.JPG	8	6
KRN20110928T014800E06000Q.JPG	8	6
KRN20110928T014900E06000Q.JPG	6	6
KRN20110928T015000E06000Q.JPG	6	6
KRN20110930T232000E06000Q.JPG	3	3
KRN20110930T232100E06000Q.JPG	3	3
KRN20110930T232200E06000Q.JPG	3	3
KRN20110930T232300E06000Q.JPG	8	3
KRN20110930T232400E06000Q.JPG	4	4
KRN20110930T232500E06000Q.JPG	4	2
KRN20110930T232600E06000Q.JPG	2	4
KRN20110930T232700E06000Q.JPG	4	4
KRN20110930T232800E06000Q.JPG	2	8
KRN20110930T232900E06000Q.JPG	2	2
KRN20110930T233000E06000Q.JPG	2	2
KRN20110930T233100E06000Q.JPG	8	2
KRN20110930T233200E06000Q.JPG	8	8
KRN20110930T233300E06000Q.JPG	4	4
KRN20110930T233400E06000Q.JPG	8	5
KRN20110930T233500E06000Q.JPG	2	2
KRN20110930T233600E06000Q.JPG	4	8
KRN20110930T233700E06000Q.JPG	4	5
KRN20110930T233800E06000Q.JPG	8	5
KRN20110930T233900E06000Q.JPG	8	5
KRN20110930T234000E06000Q.JPG	2	8
KRN20110930T234100E06000Q.JPG	4	8
KRN20110930T234200E06000Q.JPG	8	5
KRN20110930T234300E06000Q.JPG	8	5
KRN20110930T234400E06000Q.JPG	5	5
KRN20110930T234500E06000Q.JPG	5	5
KRN20110930T234600E06000Q.JPG	5	5
KRN20110930T234700E06000Q.JPG	5	5
KRN20110930T234800E06000Q.JPG	5	5
KRN20110930T234900E06000Q.JPG	5	5
KRN20110930T235000E06000Q.JPG	5	5
KRN20110930T235100E06000Q.JPG	5	5
KRN20110930T235200E06000Q.JPG	8	5
KRN20110930T235300E06000Q.JPG	5	5
KRN20110930T235400E06000Q.JPG	5	5
KRN20110930T235500E06000Q.JPG	5	5
KRN20110930T235600E06000Q.JPG	8	5
KRN20110930T235700E06000Q.JPG	8	5
KRN20110930T235800E06000Q.JPG	8	5
KRN20110930T235900E06000Q.JPG	8	8
KRN20111001T000000E06000Q.JPG	8	5
KRN20111001T000100E06000Q.JPG	5	5
KRN20111001T000200E06000Q.JPG	5	5
KRN20111001T000300E06000Q.JPG	5	5
KRN20111001T000400E06000Q.JPG	5	5
KRN20111001T000500E06000Q.JPG	8	5
KRN20111001T000600E06000Q.JPG	5	5
KRN20111001T000700E06000Q.JPG	8	5
KRN20111001T000800E06000Q.JPG	8	5
KRN20111001T000900E06000Q.JPG	8	5
KRN20111001T001000E06000Q.JPG	8	5
KRN20111001T001100E06000Q.JPG	8	8
KRN20111001T001200E06000Q.JPG	8	5
KRN20111001T001300E06000Q.JPG	8	8
KRN20111001T001400E06000Q.JPG	5	8
KRN20111001T001500E06000Q.JPG	5	5
KRN20111001T001600E06000Q.JPG	5	8
KRN20111001T001700E06000Q.JPG	5	8
KRN20111001T001800E06000Q.JPG	5	5
KRN20111001T001900E06000Q.JPG	5	5
KRN20111001T002000E06000Q.JPG	5	5
KRN20111001T002100E06000Q.JPG	5	5
KRN20111001T002200E06000Q.JPG	5	5
KRN20111001T002300E06000Q.JPG	5	5
KRN20111001T002400E06000Q.JPG	5	5
KRN20111001T002500E06000Q.JPG	5	5
KRN20111001T002600E06000Q.JPG	5	5
KRN20111001T002700E06000Q.JPG	5	8
KRN20111001T002800E06000Q.JPG	5	5
KRN20111001T002900E06000Q.JPG	5	8
KRN20111001T003000E06000Q.JPG	5	5
KRN20111001T003100E06000Q.JPG	5	8
KRN20111001T003200E06000Q.JPG	8	5
KRN20111001T003300E06000Q.JPG	8	5
KRN20111001T003400E06000Q.JPG	5	5
KRN20111001T003500E06000Q.JPG	5	5
KRN20111001T003600E06000Q.JPG	5	5
KRN20111001T003700E06000Q.JPG	5	8
KRN20111001T003800E06000Q.JPG	5	5
KRN20111001T003900E06000Q.JPG	5	8
KRN20111001T004000E06000Q.JPG	5	5
KRN20111001T004100E06000Q.JPG	5	5
KRN20111001T004200E06000Q.JPG	5	5
KRN20111001T004300E06000Q.JPG	5	8
KRN20111001T004400E06000Q.JPG	5	5
KRN20111001T004500E06000Q.JPG	8	5
KRN20111001T004600E06000Q.JPG	8	5
KRN20111001T004700E06000Q.JPG	5	5
KRN20111001T004800E06000Q.JPG	5	5
KRN20111001T004900E06000Q.JPG	5	8
KRN20111001T005000E06000Q.JPG	5	5
KRN20111001T005100E06000Q.JPG	8	5
KRN20111001T005200E06000Q.JPG	5	5
KRN20111001T005300E06000Q.JPG	5	5
KRN20111001T005400E06000Q.JPG	5	5
KRN20111001T005500E06000Q.JPG	5	8
KRN20111001T005600E06000Q.JPG	8	5
KRN20111001T005700E06000Q.JPG	8	5
KRN20111001T005800E06000Q.JPG	8	8
KRN20111001T005900E06000Q.JPG	8	8
KRN20111001T010000E06000Q.JPG	8	8
KRN20111001T010100E06000Q.JPG	8	8
KRN20111001T010200E06000Q.JPG	8	8
KRN20111001T010300E06000Q.JPG	8	8
KRN20111001T010400E06000Q.JPG	8	8
KRN20111001T010500E06000Q.JPG	8	8
KRN20111001T010600E06000Q.JPG	8	5
KRN20111001T010700E06000Q.JPG	8	5
KRN20111001T010800E06000Q.JPG	8	5
KRN20111001T010900E06000Q.JPG	8	5
KRN20111001T011000E06000Q.JPG	8	5
KRN20111001T011100E06000Q.JPG	8	8
KRN20111001T011200E06000Q.JPG	5	5
KRN20111001T011300E06000Q.JPG	5	5
KRN20111001T011400E06000Q.JPG	5	8
KRN20111001T011500E06000Q.JPG	5	5
KRN20111001T011600E06000Q.JPG	5	5
KRN20111001T011700E06000Q.JPG	5	5
KRN20111001T011800E06000Q.JPG	5	5
KRN20111001T011900E06000Q.JPG	5	5
KRN20111001T012000E06000Q.JPG	5	5
KRN20111001T012100E06000Q.JPG	5	8
KRN20111001T012200E06000Q.JPG	5	8
KRN20111001T012300E06000Q.JPG	5	8
KRN20111001T012400E06000Q.JPG	5	5
KRN20111001T012500E06000Q.JPG	8	5
KRN20111001T012600E06000Q.JPG	8	5
KRN20111001T012700E06000Q.JPG	8	7
KRN20111001T012800E06000Q.JPG	7	8
KRN20111001T012900E06000Q.JPG	7	6
KRN20111001T013000E06000Q.JPG	7	8
KRN20111009T014500E06000Q.JPG	8	5
KRN20111009T014600E06000Q.JPG	8	5
KRN20111009T014700E06000Q.JPG	8	5
KRN20111009T014800E06000Q.JPG	8	5
KRN20111009T014900E06000Q.JPG	8	5
KRN20111009T015000E06000Q.JPG	8	5
KRN20111009T015100E06000Q.JPG	8	5
KRN20111009T015200E06000Q.JPG	8	5
KRN20111009T015300E06000Q.JPG	8	5
KRN20111009T015400E06000Q.JPG	8	5
KRN20111009T015500E06000Q.JPG	8	5
KRN20111009T015600E06000Q.JPG	8	5
KRN20111009T015700E06000Q.JPG	8	5
KRN20111009T015800E06000Q.JPG	8	5
KRN20111009T015900E06000Q.JPG	8	5
KRN20111009T020000E06000Q.JPG	8	5
KRN20111009T020100E06000Q.JPG	8	5
KRN20111009T020200E06000Q.JPG	8	5
KRN20111009T020300E06000Q.JPG	8	5
KRN20111009T020400E06000Q.JPG	8	5
KRN20111009T020500E06000Q.JPG	8	5
KRN20111009T020600E06000Q.JPG	8	5
KRN20111009T020700E06000Q.JPG	8	5
KRN20111009T020800E06000Q.JPG	8	9
KRN20111009T020900E06000Q.JPG	8	5
KRN20111009T021000E06000Q.JPG	8	5
KRN20111009T021100E06000Q.JPG	8	5
KRN20111009T021200E06000Q.JPG	8	5
KRN20111009T021300E06000Q.JPG	8	5
KRN20111009T021400E06000Q.JPG	8	5
KRN20111009T021500E06000Q.JPG	8	5
KRN20111009T021600E06000Q.JPG	8	5
KRN20111009T021700E06000Q.JPG	8	5
KRN20111009T021800E06000Q.JPG	8	5
KRN20111009T021900E06000Q.JPG	8	5
KRN20111009T022000E06000Q.JPG	8	5
KRN20111009T022100E06000Q.JPG	8	5
KRN20111009T022200E06000Q.JPG	8	5
KRN20111009T022300E06000Q.JPG	8	5
KRN20111009T022400E06000Q.JPG	8	5
KRN20111009T022500E06000Q.JPG	8	5
KRN20111009T022600E06000Q.JPG	8	9
KRN20111009T022700E06000Q.JPG	8	5
KRN20111009T022800E06000Q.JPG	8	5
KRN20111009T022900E06000Q.JPG	8	5
KRN20111009T023000E06000Q.JPG	8	9
KRN20111009T023100E06000Q.JPG	8	5
KRN20111009T023200E06000Q.JPG	8	5
KRN20111009T023300E06000Q.JPG	8	9
KRN20111009T023400E06000Q.JPG	8	5
KRN20111009T023500E06000Q.JPG	8	5
KRN20111009T023600E06000Q.JPG	8	5
KRN20111009T023700E06000Q.JPG	8	5
KRN20111009T023800E06000Q.JPG	8	5
KRN20111009T023900E06000Q.JPG	8	5
KRN20111009T024000E06000Q.JPG	8	5
KRN20111009T024100E06000Q.JPG	8	9
KRN20111009T024200E06000Q.JPG	8	5
KRN20111009T024300E06000Q.JPG	8	5
KRN20111009T024400E06000Q.JPG	8	5
KRN20111025T000000E06000Q.JPG	0	0
KRN20111025T000100E06000Q.JPG	0	0
KRN20111025T000200E06000Q.JPG	0	0
KRN20111025T000300E06000Q.JPG	0	0
KRN20111025T000400E06000Q.JPG	0	0
KRN20111025T000500E06000Q.JPG	0	0
KRN20111025T000600E06000Q.JPG	0	0
KRN20111025T000700E06000Q.JPG	0	0
KRN20111025T000800E06000Q.JPG	0	0
KRN20111025T000900E06000Q.JPG	0	0
KRN20111025T001000E06000Q.JPG	0	0
KRN20111025T001100E06000Q.JPG	0	0
KRN20111025T001200E06000Q.JPG	0	0
KRN20111025T001300E06000Q.JPG	0	0
KRN20111025T001400E06000Q.JPG	0	0
KRN20111025T001500E06000Q.JPG	0	0
KRN20111025T001600E06000Q.JPG	0	0
KRN20111025T001700E06000Q.JPG	0	0
KRN20111025T001800E06000Q.JPG	1	0
KRN20111025T001900E06000Q.JPG	1	1
KRN20111025T002000E06000Q.JPG	1	0
KRN20111025T002100E06000Q.JPG	1	1
KRN20111025T002200E06000Q.JPG	1	5
KRN20111025T002300E06000Q.JPG	8	8
KRN20111025T002400E06000Q.JPG	8	5
KRN20111025T002500E06000Q.JPG	8	5
KRN20111025T002600E06000Q.JPG	8	5
KRN20111025T002700E06000Q.JPG	8	5
KRN20111025T002800E06000Q.JPG	8	5
KRN20111025T002900E06000Q.JPG	8	5
KRN20111025T003000E06000Q.JPG	8	5
KRN20111025T003100E06000Q.JPG	8	5
KRN20111025T003200E06000Q.JPG	8	5
KRN20111025T003300E06000Q.JPG	8	5
KRN20111025T003400E06000Q.JPG	4	8
KRN20111025T003500E06000Q.JPG	8	8
KRN20111025T003600E06000Q.JPG	8	5
KRN20111025T003700E06000Q.JPG	8	8
KRN20111025T003800E06000Q.JPG	8	8
KRN20111025T003900E06000Q.JPG	2	8
KRN20111025T004000E06000Q.JPG	2	8
KRN20111025T004100E06000Q.JPG	8	8
KRN20111025T004200E06000Q.JPG	8	5
KRN20111025T004300E06000Q.JPG	8	5
KRN20111025T004400E06000Q.JPG	8	5
KRN20111025T004500E06000Q.JPG	5	5
KRN20111025T004600E06000Q.JPG	8	8
KRN20111025T004700E06000Q.JPG	8	8
KRN20111025T004800E06000Q.JPG	8	8
KRN20111025T004900E06000Q.JPG	8	1
KRN20111025T005000E06000Q.JPG	1	1
KRN20111025T005100E06000Q.JPG	1	1
KRN20111025T005200E06000Q.JPG	1	1
KRN20111025T005300E06000Q.JPG	8	1
KRN20111025T005400E06000Q.JPG	8	1
KRN20111025T005500E06000Q.JPG	1	1
KRN20111025T005600E06000Q.JPG	1	1
KRN20111025T005700E06000Q.JPG	8	0
KRN20111025T005800E06000Q.JPG	8	0
KRN20111025T005900E06000Q.JPG	8	0
KRN20111025T010000E06000Q.JPG	8	8
KRN20111025T010100E06000Q.JPG	8	5
KRN20111025T010200E06000Q.JPG	8	5
KRN20111025T010300E06000Q.JPG	5	5
KRN20111025T010400E06000Q.JPG	5	5
KRN20111025T010500E06000Q.JPG	5	8
KRN20111025T010600E06000Q.JPG	5	5
KRN20111025T010700E06000Q.JPG	5	5
KRN20111025T010800E06000Q.JPG	5	5
KRN20111025T010900E06000Q.JPG	5	8
KRN20111025T011000E06000Q.JPG	8	8
KRN20111025T011100E06000Q.JPG	1	1
KRN20111025T011200E06000Q.JPG	1	1
KRN20111025T011300E06000Q.JPG	1	1
KRN20111025T011400E06000Q.JPG	1	1
KRN20111025T011500E06000Q.JPG	8	1
KRN20111025T011600E06000Q.JPG	8	8
KRN20111025T011700E06000Q.JPG	8	8
KRN20111025T011800E06000Q.JPG	8	6
KRN20111025T011900E06000Q.JPG	8	6
KRN20111025T012000E06000Q.JPG	6	1
KRN20111025T012100E06000Q.JPG	6	1
KRN20111025T012200E06000Q.JPG	6	6
KRN20111025T012300E06000Q.JPG	6	1
KRN20111025T012400E06000Q.JPG	6	1
KRN20111025T012500E06000Q.JPG	8	1
KRN20111025T012600E06000Q.JPG	8	1
KRN20111025T012700E06000Q.JPG	8	1
KRN20111025T012800E06000Q.JPG	8	1
KRN20111025T012900E06000Q.JPG	8	1
KRN20111025T013000E06000Q.JPG	8	1
KRN20111025T013100E06000Q.JPG	8	1
KRN20111025T013200E06000Q.JPG	8	1
KRN20111025T013300E06000Q.JPG	8	8
KRN20111025T013400E06000Q.JPG	8	1
KRN20111025T013500E06000Q.JPG	8	1
KRN20111025T013600E06000Q.JPG	8	1
KRN20111025T013700E06000Q.JPG	8	8
KRN20111025T013800E06000Q.JPG	8	1
KRN20111025T013900E06000Q.JPG	1	1
KRN20111025T014000E06000Q.JPG	1	1
KRN20111025T014100E06000Q.JPG	1	1
KRN20111025T014200E06000Q.JPG	1	1
KRN20111025T014300E06000Q.JPG	1	1
KRN20111025T014400E06000Q.JPG	1	1
KRN20111025T014500E06000Q.JPG	1	1
KRN20111025T014600E06000Q.JPG	1	1
KRN20111025T014700E06000Q.JPG	1	1
KRN20111025T014800E06000Q.JPG	6	1
KRN20111025T014900E06000Q.JPG	6	1
KRN20111025T015000E06000Q.JPG	8	1
KRN20111025T015100E06000Q.JPG	8	8
KRN20111025T015200E06000Q.JPG	8	5
KRN20111025T015300E06000Q.JPG	8	5
KRN20111025T015400E06000Q.JPG	8	5
KRN20111025T015500E06000Q.JPG	4	8
KRN20111025T015600E06000Q.JPG	8	1
KRN20111025T015700E06000Q.JPG	8	1
KRN20111025T015800E06000Q.JPG	8	1
KRN20111025T015900E06000Q.JPG	8	1
KRN20111025T020000E06000Q.JPG	8	8
KRN20111025T020100E06000Q.JPG	8	8
KRN20111025T020200E06000Q.JPG	8	8
KRN20111025T020300E06000Q.JPG	8	8
KRN20111025T020400E06000Q.JPG	8	8
KRN20111025T020500E06000Q.JPG	8	8
KRN20111025T020600E06000Q.JPG	8	5
KRN20111025T020700E06000Q.JPG	8	5
KRN20111025T020800E06000Q.JPG	8	5
KRN20111025T020900E06000Q.JPG	8	5
KRN20111025T021000E06000Q.JPG	8	5
KRN20111025T021100E06000Q.JPG	8	8
KRN20111025T021200E06000Q.JPG	8	8
KRN20111025T021300E06000Q.JPG	8	8
KRN20111025T021400E06000Q.JPG	8	8
KRN20111025T021500E06000Q.JPG	8	8
KRN20111025T021600E06000Q.JPG	8	8
KRN20111025T021700E06000Q.JPG	8	8
KRN20111025T021800E06000Q.JPG	8	5
KRN20111025T021900E06000Q.JPG	8	8
KRN20111025T022000E06000Q.JPG	8	8
KRN20111025T022100E06000Q.JPG	8	8
KRN20111025T022200E06000Q.JPG	8	8
KRN20111025T022300E06000Q.JPG	8	8
KRN20111025T022400E06000Q.JPG	8	8
KRN20111025T022500E06000Q.JPG	6	6
KRN20111025T022600E06000Q.JPG	8	6
KRN20111025T022700E06000Q.JPG	8	5
KRN20111025T022800E06000Q.JPG	7	8
KRN20111025T022900E06000Q.JPG	7	7
KRN20111025T023000E06000Q.JPG	8	8
KRN20111025T030000E06000Q.JPG	4	8
KRN20111025T030100E06000Q.JPG	8	8
KRN20111025T030200E06000Q.JPG	8	8
KRN20111025T030300E06000Q.JPG	8	2
KRN20111025T030400E06000Q.JPG	8	1
KRN20111025T030500E06000Q.JPG	8	8
KRN20111025T030600E06000Q.JPG	8	1
KRN20111025T030700E06000Q.JPG	8	8
KRN20111025T030800E06000Q.JPG	8	8
KRN20111025T030900E06000Q.JPG	8	7
KRN20111025T031000E06000Q.JPG	8	4
KRN20111025T031100E06000Q.JPG	8	8
KRN20111025T031200E06000Q.JPG	8	8
KRN20111025T031300E06000Q.JPG	8	8
KRN20111025T031400E06000Q.JPG	8	8
KRN20111025T031500E06000Q.JPG	1	8
KRN20111025T031600E06000Q.JPG	1	1
KRN20111025T031700E06000Q.JPG	7	8
KRN20111025T031800E06000Q.JPG	7	8
KRN20111025T031900E06000Q.JPG	7	7
KRN20111025T032000E06000Q.JPG	7	8
KRN20111025T032100E06000Q.JPG	6	6
KRN20111025T032200E06000Q.JPG	8	1
KRN20111025T032300E06000Q.JPG	8	1
KRN20111025T032400E06000Q.JPG	1	1
KRN20111025T032500E06000Q.JPG	1	1
KRN20111025T032600E06000Q.JPG	1	1
KRN20111025T032700E06000Q.JPG	1	1
KRN20111025T032800E06000Q.JPG	1	1
KRN20111025T032900E06000Q.JPG	1	1
KRN20111025T033000E06000Q.JPG	1	1
KRN20111025T033100E06000Q.JPG	1	1
KRN20111025T033200E06000Q.JPG	1	1
KRN20111025T033300E06000Q.JPG	1	1
KRN20111025T033400E06000Q.JPG	1	1
KRN20111025T033500E06000Q.JPG	1	1
KRN20111025T033600E06000Q.JPG	1	1
KRN20111025T033700E06000Q.JPG	1	1
KRN20111025T033800E06000Q.JPG	1	1
KRN20111025T033900E06000Q.JPG	1	1
KRN20111025T034000E06000Q.JPG	1	1
KRN20111124T202000E06000Q.JPG	8	6
KRN20111124T202100E06000Q.JPG	8	5
KRN20111124T202200E06000Q.JPG	7	5
KRN20111124T202300E06000Q.JPG	7	8
KRN20111124T202400E06000Q.JPG	7	5
KRN20111124T202500E06000Q.JPG	8	8
KRN20111124T202600E06000Q.JPG	8	3
KRN20111124T202700E06000Q.JPG	8	3
KRN20111124T202800E06000Q.JPG	8	3
KRN20111124T202900E06000Q.JPG	3	3
KRN20111124T203000E06000Q.JPG	3	3
KRN20111124T203100E06000Q.JPG	3	3
KRN20111124T203200E06000Q.JPG	3	3
KRN20111124T203300E06000Q.JPG	3	8
KRN20111124T203400E06000Q.JPG	8	6
KRN20111124T203500E06000Q.JPG	8	6
KRN20111124T203600E06000Q.JPG	8	3
KRN20111124T203700E06000Q.JPG	8	3
KRN20111124T203800E06000Q.JPG	8	3
KRN20111124T203900E06000Q.JPG	8	6
KRN20111124T204000E06000Q.JPG	3	3
KRN20111124T204100E06000Q.JPG	3	3
KRN20111124T204200E06000Q.JPG	3	3
KRN20111124T204300E06000Q.JPG	3	3
KRN20111124T204400E06000Q.JPG	3	3
KRN20111124T204500E06000Q.JPG	3	8
KRN20111124T204600E06000Q.JPG	8	8
KRN20111124T204700E06000Q.JPG	7	5
KRN20111124T204800E06000Q.JPG	7	3
KRN20111124T204900E06000Q.JPG	7	3
KRN20111124T205000E06000Q.JPG	6	8
KRN20111124T205100E06000Q.JPG	8	8
KRN20111124T205200E06000Q.JPG	8	8
KRN20111124T205300E06000Q.JPG	8	6
KRN20111124T205400E06000Q.JPG	8	6
KRN20111124T205500E06000Q.JPG	8	6
KRN20111124T205600E06000Q.JPG	6	6
KRN20111124T205700E06000Q.JPG	6	6
KRN20111124T205800E06000Q.JPG	6	6
KRN20111124T205900E06000Q.JPG	8	6
KRN20111124T210000E06000Q.JPG	8	6
KRN20111124T210100E06000Q.JPG	8	6
KRN20111124T210200E06000Q.JPG	8	5
KRN20111124T210300E06000Q.JPG	8	5
KRN20111124T210400E06000Q.JPG	7	8
KRN20111124T210500E06000Q.JPG	7	5
KRN20111124T210600E06000Q.JPG	7	5
KRN20111124T210700E06000Q.JPG	7	5
KRN20111124T210800E06000Q.JPG	8	5
KRN20111124T210900E06000Q.JPG	3	3
KRN20111124T211000E06000Q.JPG	8	8
KRN20111124T211100E06000Q.JPG	8	8
KRN20111124T211200E06000Q.JPG	8	8
KRN20111124T211300E06000Q.JPG	8	8
KRN20111124T211400E06000Q.JPG	4	8
KRN20111124T211500E06000Q.JPG	8	8
KRN20111124T211600E06000Q.JPG	4	8
KRN20111124T211700E06000Q.JPG	8	8
KRN20111124T211800E06000Q.JPG	4	8
KRN20111124T211900E06000Q.JPG	4	8
KRN20111124T212000E06000Q.JPG	4	4
KRN20111124T212100E06000Q.JPG	4	8
KRN20111124T212200E06000Q.JPG	8	8
KRN20111124T212300E06000Q.JPG	8	5
KRN20111124T212400E06000Q.JPG	8	5
KRN20111124T212500E06000Q.JPG	8	5
KRN20111124T212600E06000Q.JPG	8	5
KRN20111124T212700E06000Q.JPG	8	5
KRN20111124T212800E06000Q.JPG	8	5
KRN20111124T212900E06000Q.JPG	3	5
KRN20111124T213000E06000Q.JPG	3	3
KRN20111124T213100E06000Q.JPG	3	3
KRN20111124T213200E06000Q.JPG	3	5
KRN20111124T213300E06000Q.JPG	3	3
KRN20111124T213400E06000Q.JPG	3	3
KRN20111124T213500E06000Q.JPG	3	3
KRN20111124T213600E06000Q.JPG	3	3
KRN20111124T213700E06000Q.JPG	3	3
KRN20111124T213800E06000Q.JPG	7	3
KRN20111124T213900E06000Q.JPG	7	3
KRN20111124T214000E06000Q.JPG	8	3
KRN20111124T214100E06000Q.JPG	7	8
KRN20111124T214200E06000Q.JPG	8	3
KRN20111124T214300E06000Q.JPG	8	5
KRN20111124T214400E06000Q.JPG	8	5
KRN20111124T214500E06000Q.JPG	3	3
KRN20111124T214600E06000Q.JPG	3	8
KRN20111124T214700E06000Q.JPG	8	5
KRN20111124T214800E06000Q.JPG	8	5
KRN20111124T214900E06000Q.JPG	8	5
KRN20111124T215000E06000Q.JPG	8	5
KRN20111124T215100E06000Q.JPG	8	5
KRN20111124T215200E06000Q.JPG	8	5
KRN20111124T215300E06000Q.JPG	8	8
KRN20111124T215400E06000Q.JPG	8	5
KRN20111124T215500E06000Q.JPG	3	8
KRN20111124T215600E06000Q.JPG	3	5
KRN20111124T215700E06000Q.JPG	8	8
KRN20111124T215800E06000Q.JPG	3	3
KRN20111124T215900E06000Q.JPG	3	3
KRN20111124T220000E06000Q.JPG	3	3
KRN20111124T220100E06000Q.JPG	3	8
KRN20111124T220200E06000Q.JPG	3	8
KRN20111124T220300E06000Q.JPG	2	8
KRN20111124T220400E06000Q.JPG	2	2
KRN20111124T220500E06000Q.JPG	2	2
KRN20111124T220600E06000Q.JPG	3	8
KRN20111124T220700E06000Q.JPG	3	3
KRN20111124T220800E06000Q.JPG	2	2
KRN20111124T220900E06000Q.JPG	3	5
KRN20111124T221000E06000Q.JPG	3	8
KRN20111124T221100E06000Q.JPG	3	8
KRN20111124T221200E06000Q.JPG	3	8
KRN20111124T221300E06000Q.JPG	8	8
KRN20111124T221400E06000Q.JPG	8	8
KRN20111124T221500E06000Q.JPG	8	8
KRN20111124T221600E06000Q.JPG	8	8
KRN20111124T221700E06000Q.JPG	8	5
KRN20111124T221800E06000Q.JPG	8	5
KRN20111124T221900E06000Q.JPG	8	5
KRN20111124T222000E06000Q.JPG	8	5
KRN20111124T222100E06000Q.JPG	8	5
KRN20111124T222200E06000Q.JPG	8	5
KRN20111124T222300E06000Q.JPG	8	5
KRN20111124T222400E06000Q.JPG	8	5
KRN20111124T222500E06000Q.JPG	5	5
KRN20111124T222600E06000Q.JPG	5	5
KRN20111124T222700E06000Q.JPG	5	5
KRN20111124T222800E06000Q.JPG	8	5
KRN20111124T222900E06000Q.JPG	8	5
KRN20111124T223000E06000Q.JPG	8	4
KRN20111124T223100E06000Q.JPG	8	8
KRN20111124T223200E06000Q.JPG	8	5
KRN20111124T223300E06000Q.JPG	8	8
KRN20111124T223400E06000Q.JPG	8	5
KRN20111124T223500E06000Q.JPG	8	5
KRN20111124T223600E06000Q.JPG	8	8
KRN20111124T223700E06000Q.JPG	8	5
KRN20111124T223800E06000Q.JPG	8	5
KRN20111124T223900E06000Q.JPG	8	5
KRN20111124T224000E06000Q.JPG	5	5
KRN20111124T224100E06000Q.JPG	5	8
KRN20111124T224200E06000Q.JPG	5	5
KRN20111124T224300E06000Q.JPG	5	5
KRN20111124T224400E06000Q.JPG	5	5
KRN20111124T224500E06000Q.JPG	5	5
KRN20111124T224600E06000Q.JPG	5	5
KRN20111124T224700E06000Q.JPG	5	5
KRN20111124T224800E06000Q.JPG	5	5
KRN20111124T224900E06000Q.JPG	5	5
KRN20111124T225000E06000Q.JPG	5	5
KRN20111124T225100E06000Q.JPG	5	5
KRN20111124T225200E06000Q.JPG	5	5
KRN20111124T225300E06000Q.JPG	5	5
KRN20111124T225400E06000Q.JPG	5	5
KRN20111124T225500E06000Q.JPG	5	5
KRN20111124T225600E06000Q.JPG	5	5
KRN20111124T225700E06000Q.JPG	5	5
KRN20111124T225800E06000Q.JPG	5	5
KRN20111124T225900E06000Q.JPG	5	5
KRN20111124T230000E06000Q.JPG	5	5
KRN20111124T230100E06000Q.JPG	5	5
KRN20111124T230200E06000Q.JPG	5	5
KRN20111124T230300E06000Q.JPG	8	5
KRN20111124T230400E06000Q.JPG	8	5
KRN20111124T230500E06000Q.JPG	8	5
KRN20111124T230600E06000Q.JPG	8	5
KRN20111124T230700E06000Q.JPG	8	5
KRN20111124T230800E06000Q.JPG	8	5
KRN20111124T230900E06000Q.JPG	8	5
KRN20111124T231000E06000Q.JPG	8	8
KRN20111128T222000E06000Q.JPG	7	6
KRN20111128T222100E06000Q.JPG	8	8
KRN20111128T222200E06000Q.JPG	8	6
KRN20111128T222300E06000Q.JPG	6	8
KRN20111128T222400E06000Q.JPG	6	6
KRN20111128T222500E06000Q.JPG	6	6
KRN20111128T222600E06000Q.JPG	8	8
KRN20111128T222700E06000Q.JPG	8	8
KRN20111128T222800E06000Q.JPG	8	6
KRN20111128T222900E06000Q.JPG	8	6
KRN20111128T223000E06000Q.JPG	8	6
KRN20111128T223100E06000Q.JPG	8	5
KRN20111128T223200E06000Q.JPG	8	3
KRN20111128T223300E06000Q.JPG	8	8
KRN20111128T223400E06000Q.JPG	8	5
KRN20111128T223500E06000Q.JPG	8	8
KRN20111128T223600E06000Q.JPG	8	8
KRN20111128T223700E06000Q.JPG	8	3
KRN20111128T223800E06000Q.JPG	8	5
KRN20111128T223900E06000Q.JPG	8	8
KRN20111128T224000E06000Q.JPG	8	8
KRN20111128T224100E06000Q.JPG	4	8
KRN20111128T224200E06000Q.JPG	8	1
KRN20111128T224300E06000Q.JPG	4	8
KRN20111128T224400E06000Q.JPG	4	1
KRN20111128T224500E06000Q.JPG	4	8
KRN20111128T224600E06000Q.JPG	8	8
KRN20111128T224700E06000Q.JPG	8	3
KRN20111128T224800E06000Q.JPG	8	3
KRN20111128T224900E06000Q.JPG	8	8
KRN20111128T225000E06000Q.JPG	8	3
KRN20111128T225100E06000Q.JPG	8	3
KRN20111128T225200E06000Q.JPG	4	4
KRN20111128T225300E06000Q.JPG	4	4
KRN20111128T225400E06000Q.JPG	3	1
KRN20111128T225500E06000Q.JPG	8	8
KRN20111128T225600E06000Q.JPG	4	8
KRN20111128T225700E06000Q.JPG	4	2
KRN20111128T225800E06000Q.JPG	4	8
KRN20111128T225900E06000Q.JPG	3	3
KRN20111128T230000E06000Q.JPG	3	2
KRN20111128T230100E06000Q.JPG	3	8
KRN20111128T230200E06000Q.JPG	2	8
KRN20111128T230300E06000Q.JPG	0	8
KRN20111128T230400E06000Q.JPG	8	8
KRN20111128T230500E06000Q.JPG	8	8
KRN20111128T230600E06000Q.JPG	3	3
KRN20111128T230700E06000Q.JPG	3	3
KRN20111128T230800E06000Q.JPG	3	3
KRN20111128T230900E06000Q.JPG	3	3
KRN20111128T231000E06000Q.JPG	8	3
KRN20111128T231100E06000Q.JPG	8	2
KRN20111128T231200E06000Q.JPG	8	8
KRN20111128T231300E06000Q.JPG	8	5
KRN20111128T231400E06000Q.JPG	8	5
KRN20111128T231500E06000Q.JPG	8	5
KRN20111128T231600E06000Q.JPG	8	8
KRN20111128T231700E06000Q.JPG	8	8
KRN20111128T231800E06000Q.JPG	8	5
KRN20111128T231900E06000Q.JPG	8	5
KRN20111128T232000E06000Q.JPG	8	5
KRN20111128T232100E06000Q.JPG	8	5
KRN20111128T232200E06000Q.JPG	8	5
KRN20111128T232300E06000Q.JPG	8	2
KRN20111128T232400E06000Q.JPG	8	8
KRN20111128T232500E06000Q.JPG	8	8
KRN20111128T232600E06000Q.JPG	8	8
KRN20111128T232700E06000Q.JPG	8	8
KRN20111128T232800E06000Q.JPG	8	5
KRN20111128T232900E06000Q.JPG	8	8
KRN20111128T233000E06000Q.JPG	8	5
KRN20111128T233100E06000Q.JPG	4	5
KRN20111128T233200E06000Q.JPG	4	0
KRN20111128T233300E06000Q.JPG	2	4
KRN20111128T233400E06000Q.JPG	8	8
KRN20111128T233500E06000Q.JPG	5	5
KRN20111128T233600E06000Q.JPG	5	0
KRN20111128T233700E06000Q.JPG	5	5
KRN20111128T233800E06000Q.JPG	5	5
KRN20111128T233900E06000Q.JPG	5	5
KRN20111128T234000E06000Q.JPG	5	5
KRN20111128T234100E06000Q.JPG	5	5
KRN20111128T234200E06000Q.JPG	5	5
KRN20111128T234300E06000Q.JPG	5	5
KRN20111128T234400E06000Q.JPG	5	5
KRN20111128T234500E06000Q.JPG	5	5
KRN20111128T234600E06000Q.JPG	5	5
KRN20111128T234700E06000Q.JPG	5	5
KRN20111128T234800E06000Q.JPG	5	5
KRN20111128T234900E06000Q.JPG	5	5
KRN20111128T235000E06000Q.JPG	5	5
KRN20111128T235100E06000Q.JPG	5	5
KRN20111128T235200E06000Q.JPG	8	5
KRN20111128T235300E06000Q.JPG	8	5
KRN20111128T235400E06000Q.JPG	8	5
KRN20111128T235500E06000Q.JPG	8	8
KRN20111128T235600E06000Q.JPG	8	8
KRN20111128T235700E06000Q.JPG	8	8
KRN20111128T235800E06000Q.JPG	8	8
KRN20111128T235900E06000Q.JPG	8	5
KRN20111129T000000E06000Q.JPG	8	5
KRN20111129T000100E06000Q.JPG	8	5
KRN20111129T000200E06000Q.JPG	8	5
KRN20111129T000300E06000Q.JPG	8	5
KRN20111129T000400E06000Q.JPG	8	3
KRN20111129T000500E06000Q.JPG	8	8
KRN20111129T000600E06000Q.JPG	8	8
KRN20111129T000700E06000Q.JPG	8	5
KRN20111129T000800E06000Q.JPG	8	3
KRN20111129T000900E06000Q.JPG	8	3
KRN20111129T001000E06000Q.JPG	8	3
KRN20111129T001100E06000Q.JPG	8	3
KRN20111129T001200E06000Q.JPG	3	3
KRN20111129T001300E06000Q.JPG	3	3
KRN20111129T001400E06000Q.JPG	3	3
KRN20111129T001500E06000Q.JPG	3	3
KRN20111129T001600E06000Q.JPG	3	8
KRN20111129T001700E06000Q.JPG	3	3
KRN20111129T001800E06000Q.JPG	3	3
KRN20111129T001900E06000Q.JPG	8	3
KRN20111129T002000E06000Q.JPG	8	8
KRN20111129T002100E06000Q.JPG	2	2
KRN20111129T002200E06000Q.JPG	2	2
KRN20111129T002300E06000Q.JPG	2	2
KRN20111129T002400E06000Q.JPG	2	3
KRN20111129T002500E06000Q.JPG	3	3
KRN20111129T002600E06000Q.JPG	3	3
KRN20111129T002700E06000Q.JPG	3	3
KRN20111129T002800E06000Q.JPG	8	3
KRN20111129T002900E06000Q.JPG	3	3
KRN20111129T003000E06000Q.JPG	8	3
KRN20111129T003100E06000Q.JPG	8	3
KRN20111129T003200E06000Q.JPG	8	2
KRN20111129T003300E06000Q.JPG	8	3
KRN20111129T003400E06000Q.JPG	3	3
KRN20111129T003500E06000Q.JPG	3	3
KRN20111129T003600E06000Q.JPG	3	3
KRN20111129T003700E06000Q.JPG	3	8
KRN20111129T003800E06000Q.JPG	8	8
KRN20111129T003900E06000Q.JPG	8	8
KRN20111129T004000E06000Q.JPG	8	3
KRN20111129T004100E06000Q.JPG	8	8
KRN20111129T004200E06000Q.JPG	8	8
KRN20111129T004300E06000Q.JPG	8	8
KRN20111129T004400E06000Q.JPG	2	0
KRN20111129T004500E06000Q.JPG	2	8
KRN20111129T004600E06000Q.JPG	8	8
KRN20111129T004700E06000Q.JPG	8	8
KRN20111129T004800E06000Q.JPG	8	8
KRN20111129T004900E06000Q.JPG	8	0
KRN20111129T005000E06000Q.JPG	8	0
KRN20111129T005100E06000Q.JPG	8	0
KRN20111129T005200E06000Q.JPG	4	0
KRN20111129T005300E06000Q.JPG	4	4
KRN20111129T005400E06000Q.JPG	8	0
KRN20111129T005500E06000Q.JPG	8	0
KRN20111129T005600E06000Q.JPG	8	8
KRN20111129T005700E06000Q.JPG	4	0
KRN20111129T005800E06000Q.JPG	8	8
KRN20111129T005900E06000Q.JPG	8	8
KRN20111129T010000E06000Q.JPG	8	5
KRN20111129T010100E06000Q.JPG	4	8
KRN20111129T010200E06000Q.JPG	8	0
KRN20111129T010300E06000Q.JPG	8	0
KRN20111129T010400E06000Q.JPG	8	0
KRN20111129T010500E06000Q.JPG	8	0
KRN20111129T010600E06000Q.JPG	8	8
KRN20111129T010700E06000Q.JPG	8	8
KRN20111129T010800E06000Q.JPG	5	8
KRN20111129T010900E06000Q.JPG	8	5
KRN20111129T011000E06000Q.JPG	8	5
KRN20111129T011100E06000Q.JPG	8	5
KRN20111129T011200E06000Q.JPG	8	8
KRN20111129T011300E06000Q.JPG	5	5
KRN20111129T011400E06000Q.JPG	5	8
KRN20111129T011500E06000Q.JPG	5	5
KRN20111129T011600E06000Q.JPG	5	5
KRN20111129T011700E06000Q.JPG	5	5
KRN20111129T011800E06000Q.JPG	5	8
KRN20111129T011900E06000Q.JPG	8	8
KRN20111129T012000E06000Q.JPG	5	8
KRN20111129T012100E06000Q.JPG	5	5
KRN20111129T012200E06000Q.JPG	5	8
KRN20111129T012300E06000Q.JPG	5	8
KRN20111129T012400E06000Q.JPG	8	8
KRN20111129T012500E06000Q.JPG	8	8
KRN20111129T012600E06000Q.JPG	8	8
KRN20111129T012700E06000Q.JPG	8	8
KRN20111129T012800E06000Q.JPG	8	8
KRN20111129T012900E06000Q.JPG	8	5
KRN20111129T013000E06000Q.JPG	8	8
KRN20111130T205000E06000Q.JPG	7	8
KRN20111130T205100E06000Q.JPG	8	8
KRN20111130T205200E06000Q.JPG	6	8
KRN20111130T205300E06000Q.JPG	6	8
KRN20111130T205400E06000Q.JPG	6	8
KRN20111130T205500E06000Q.JPG	8	2
KRN20111130T205600E06000Q.JPG	8	2
KRN20111130T205700E06000Q.JPG	2	2
KRN20111130T205800E06000Q.JPG	8	2
KRN20111130T205900E06000Q.JPG	2	2
KRN20111130T210000E06000Q.JPG	8	2
KRN20111130T210100E06000Q.JPG	2	2
KRN20111130T210200E06000Q.JPG	0	2
KRN20111130T210300E06000Q.JPG	2	2
KRN20111130T210400E06000Q.JPG	2	2
KRN20111130T210500E06000Q.JPG	2	2
KRN20111130T210600E06000Q.JPG	2	2
KRN20111130T210700E06000Q.JPG	2	2
KRN20111130T210800E06000Q.JPG	2	2
KRN20111130T210900E06000Q.JPG	2	2
KRN20111130T211000E06000Q.JPG	2	2
KRN20111130T211100E06000Q.JPG	3	3
KRN20111130T211200E06000Q.JPG	8	3
KRN20111130T211300E06000Q.JPG	3	3
KRN20111130T211400E06000Q.JPG	3	3
KRN20111130T211500E06000Q.JPG	3	3
KRN20111130T211600E06000Q.JPG	8	3
KRN20111130T211700E06000Q.JPG	9	3
KRN20111130T211800E06000Q.JPG	9	3
KRN20111130T211900E06000Q.JPG	9	8
KRN20111130T212000E06000Q.JPG	9	8
KRN20111130T212100E06000Q.JPG	9	5
KRN20111130T212200E06000Q.JPG	2	8
KRN20111130T212300E06000Q.JPG	0	2
KRN20111130T212400E06000Q.JPG	2	2
KRN20111130T212500E06000Q.JPG	4	8
KRN20111130T212600E06000Q.JPG	2	2
KRN20111130T212700E06000Q.JPG	8	8
KRN20111130T212800E06000Q.JPG	8	5
KRN20111130T212900E06000Q.JPG	3	8
KRN20111130T213000E06000Q.JPG	3	3
KRN20111130T213100E06000Q.JPG	8	8
KRN20111130T213200E06000Q.JPG	3	3
KRN20111130T213300E06000Q.JPG	3	3
KRN20111130T213400E06000Q.JPG	3	3
KRN20111130T213500E06000Q.JPG	3	3
KRN20111130T213600E06000Q.JPG	4	8
KRN20111130T213700E06000Q.JPG	4	8
KRN20111130T213800E06000Q.JPG	4	8
KRN20111130T213900E06000Q.JPG	8	8
KRN20111130T214000E06000Q.JPG	8	8
KRN20111130T222100E06000Q.JPG	2	8
KRN20111130T222200E06000Q.JPG	4	4
KRN20111130T222300E06000Q.JPG	5	5
KRN20111130T222400E06000Q.JPG	5	5
KRN20111130T222500E06000Q.JPG	5	5
KRN20111130T222600E06000Q.JPG	5	5
KRN20111130T222700E06000Q.JPG	5	5
KRN20111130T222800E06000Q.JPG	5	5
KRN20111130T222900E06000Q.JPG	5	5
KRN20111130T223000E06000Q.JPG	5	5
KRN20111130T223100E06000Q.JPG	5	5
KRN20111130T223200E06000Q.JPG	5	5
KRN20111130T223300E06000Q.JPG	5	5
KRN20111130T223400E06000Q.JPG	5	5
KRN20111130T223500E06000Q.JPG	5	5
KRN20111130T223600E06000Q.JPG	5	5
KRN20111130T223700E06000Q.JPG	5	5
KRN20111130T223800E06000Q.JPG	5	5
KRN20111130T223900E06000Q.JPG	5	5
KRN20111130T224000E06000Q.JPG	5	5
KRN20111130T224100E06000Q.JPG	5	5
KRN20111130T224200E06000Q.JPG	5	5
KRN20111130T224300E06000Q.JPG	5	5
KRN20111130T224400E06000Q.JPG	5	5
KRN20111130T224500E06000Q.JPG	5	5
KRN20111130T224600E06000Q.JPG	5	5
KRN20111130T224700E06000Q.JPG	5	5
KRN20111130T224800E06000Q.JPG	5	5
KRN20111130T224900E06000Q.JPG	5	5
KRN20111130T225000E06000Q.JPG	5	5
KRN20111130T225100E06000Q.JPG	5	5
KRN20111130T225200E06000Q.JPG	5	5
KRN20111130T225300E06000Q.JPG	8	5
KRN20111130T225400E06000Q.JPG	8	5
KRN20111130T225500E06000Q.JPG	8	5
KRN20111130T225600E06000Q.JPG	8	5
KRN20111130T225700E06000Q.JPG	8	5
KRN20111130T225800E06000Q.JPG	5	5
KRN20111130T225900E06000Q.JPG	5	5
KRN20111130T230000E06000Q.JPG	5	5
KRN20111130T230100E06000Q.JPG	5	5
KRN20111130T230200E06000Q.JPG	5	5
KRN20111130T230300E06000Q.JPG	5	5
KRN20111130T230400E06000Q.JPG	5	5
KRN20111130T230500E06000Q.JPG	5	5
KRN20111130T230600E06000Q.JPG	5	5
KRN20111130T230700E06000Q.JPG	5	5
KRN20111130T230800E06000Q.JPG	5	5
KRN20111130T230900E06000Q.JPG	5	5
KRN20111130T231000E06000Q.JPG	5	5
KRN20111201T010000E06000Q.JPG	8	5
KRN20111201T010100E06000Q.JPG	8	5
KRN20111201T010200E06000Q.JPG	8	8
KRN20111201T010300E06000Q.JPG	8	5
KRN20111201T010400E06000Q.JPG	8	5
KRN20111201T010500E06000Q.JPG	8	3
KRN20111201T010600E06000Q.JPG	8	3
KRN20111201T010700E06000Q.JPG	3	3
KRN20111201T010800E06000Q.JPG	3	3
KRN20111201T010900E06000Q.JPG	3	3
KRN20111201T011000E06000Q.JPG	3	5
KRN20111201T011100E06000Q.JPG	3	3
KRN20111201T011200E06000Q.JPG	3	3
KRN20111201T011300E06000Q.JPG	3	3
KRN20111201T011400E06000Q.JPG	3	3
KRN20111201T011500E06000Q.JPG	8	5
KRN20111201T011600E06000Q.JPG	8	3
KRN20111201T011700E06000Q.JPG	8	5
KRN20111201T011800E06000Q.JPG	8	5
KRN20111201T011900E06000Q.JPG	8	8
KRN20111201T012000E06000Q.JPG	8	3
KRN20111201T012100E06000Q.JPG	8	8
KRN20111201T012200E06000Q.JPG	8	5
KRN20111201T012300E06000Q.JPG	8	3
KRN20111201T012400E06000Q.JPG	8	5
KRN20111201T012500E06000Q.JPG	8	5
KRN20111201T012600E06000Q.JPG	8	8
KRN20111201T012700E06000Q.JPG	5	5
KRN20111201T012800E06000Q.JPG	5	3
KRN20111201T012900E06000Q.JPG	5	3
KRN20111201T013000E06000Q.JPG	5	3
KRN20111201T013100E06000Q.JPG	5	3
KRN20111201T013200E06000Q.JPG	5	3
KRN20111201T013300E06000Q.JPG	5	5
KRN20111201T013400E06000Q.JPG	8	3
KRN20111201T013500E06000Q.JPG	8	8
KRN20111201T013600E06000Q.JPG	8	8
KRN20111201T013700E06000Q.JPG	5	3
KRN20111201T013800E06000Q.JPG	5	5
KRN20111201T013900E06000Q.JPG	5	5
KRN20111201T014000E06000Q.JPG	5	5
KRN20111201T014100E06000Q.JPG	5	5
KRN20111201T014200E06000Q.JPG	5	5
KRN20111201T014300E06000Q.JPG	5	5
KRN20111201T014400E06000Q.JPG	5	5
KRN20111201T014500E06000Q.JPG	5	5
KRN20111201T014600E06000Q.JPG	5	5
KRN20111201T014700E06000Q.JPG	5	5
KRN20111201T014800E06000Q.JPG	5	5
KRN20111201T014900E06000Q.JPG	5	5
KRN20111201T015000E06000Q.JPG	5	5
KRN20111201T015100E06000Q.JPG	5	5
KRN20111201T015200E06000Q.JPG	5	5
KRN20111201T015300E06000Q.JPG	5	5
KRN20111201T015400E06000Q.JPG	5	5
KRN20111201T015500E06000Q.JPG	5	5
KRN20111201T015600E06000Q.JPG	5	5
KRN20111201T015700E06000Q.JPG	5	5
KRN20111201T015800E06000Q.JPG	5	5
KRN20111201T015900E06000Q.JPG	5	5
KRN20111201T020000E06000Q.JPG	5	5
KRN20111201T020100E06000Q.JPG	5	5
KRN20111201T020200E06000Q.JPG	5	5
KRN20111201T020300E06000Q.JPG	5	5
KRN20111201T020400E06000Q.JPG	5	5
KRN20111201T020500E06000Q.JPG	5	5
KRN20111201T020600E06000Q.JPG	5	5
KRN20111201T020700E06000Q.JPG	5	5
KRN20111201T020800E06000Q.JPG	5	5
KRN20111201T020900E06000Q.JPG	5	5
KRN20111201T021000E06000Q.JPG	5	5
KRN20111203T012000E06000Q.JPG	8	8
KRN20111203T012100E06000Q.JPG	8	8
KRN20111203T012200E06000Q.JPG	8	8
KRN20111203T012300E06000Q.JPG	8	3
KRN20111203T012400E06000Q.JPG	8	3
KRN20111203T012500E06000Q.JPG	3	3
KRN20111203T012600E06000Q.JPG	3	3
KRN20111203T012700E06000Q.JPG	3	3
KRN20111203T012800E06000Q.JPG	8	3
KRN20111203T012900E06000Q.JPG	8	3
KRN20111203T013000E06000Q.JPG	8	3
KRN20111203T013100E06000Q.JPG	8	3
KRN20111203T013200E06000Q.JPG	8	3
KRN20111203T013300E06000Q.JPG	8	3
KRN20111203T013400E06000Q.JPG	8	3
KRN20111203T013500E06000Q.JPG	8	3
KRN20111203T013600E06000Q.JPG	8	3
KRN20111203T013700E06000Q.JPG	8	8
KRN20111203T013800E06000Q.JPG	8	8
KRN20111203T013900E06000Q.JPG	8	8
KRN20111203T014000E06000Q.JPG	3	3
KRN20111203T014100E06000Q.JPG	3	3
KRN20111203T014200E06000Q.JPG	3	3
KRN20111203T014300E06000Q.JPG	8	8
KRN20111203T014400E06000Q.JPG	8	3
KRN20111203T014500E06000Q.JPG	8	3
KRN20111203T014600E06000Q.JPG	8	3
KRN20111203T014700E06000Q.JPG	8	8
KRN20111203T014800E06000Q.JPG	8	8
KRN20111203T014900E06000Q.JPG	8	3
KRN20111203T015000E06000Q.JPG	8	8
KRN20111203T015100E06000Q.JPG	8	8
KRN20111203T015200E06000Q.JPG	8	3
KRN20111203T015300E06000Q.JPG	8	3
KRN20111203T015400E06000Q.JPG	8	3
KRN20111203T015500E06000Q.JPG	8	3
KRN20111203T015600E06000Q.JPG	8	3
KRN20111203T015700E06000Q.JPG	8	3
KRN20111203T015800E06000Q.JPG	8	8
KRN20111203T015900E06000Q.JPG	8	5
KRN20111203T020000E06000Q.JPG	8	8
KRN20111203T020100E06000Q.JPG	8	5
KRN20111203T020200E06000Q.JPG	8	5
KRN20111203T020300E06000Q.JPG	8	5
KRN20111203T020400E06000Q.JPG	8	5
KRN20111203T020500E06000Q.JPG	8	5
KRN20111203T020600E06000Q.JPG	8	5
KRN20111203T020700E06000Q.JPG	8	5
KRN20111203T020800E06000Q.JPG	8	5
KRN20111203T020900E06000Q.JPG	5	5
KRN20111203T021000E06000Q.JPG	5	5
KRN20111203T021100E06000Q.JPG	5	5
KRN20111203T021200E06000Q.JPG	5	5
[truncated: 11,971 more rows]
