# Supplementary material for: Auroral classification ergonomics and the implications for machine learning
Source: Copernicus journal article supplement (doi:10.5194/gi-9-267-2020), 2020-07-09
Supplement: Supplementary file 1 [file gi-9-267-2020-supplement.zip › gi-9-267-2020-supplement-title-page.pdf]

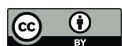

## *Supplement of*

# **Auroral classification ergonomics and the implications for machine learning**

**Derek McKay and Andreas Kvammen**

*Correspondence to:* Derek McKay ([demc@norceresearch.no](mailto:demc@norceresearch.no))

- [gi-9-267-2020-supplement-title-page.pdf](#)
- [aurnn\\_class\\_20191120a.csv](#)

The copyright of individual parts of the supplement might differ from the CC BY 4.0 License.
